# Supplementary material for: A novel membrane-permeant cADPR antagonist modified in the pyrophosphate bridge
Source: Royal Society of Chemistry journal article supplement (doi:10.1039/c1cc13062e), 2011-01-01
Supplement: c1cc13062e.pdf [file c1cc13062e.pdf]

## A Novel Membrane Permeant cADPR Antagonist

### Modified in the Pyrophosphate Bridge

N. Qi<sup>1,¶</sup>, K. Jung<sup>2,¶</sup>, M. Wang<sup>1</sup>, L. X. Na<sup>1</sup>, Z. J. Yang<sup>1,\*</sup>, L. R. Zhang<sup>1</sup>, A. H. Guse<sup>2</sup>,

L. H. Zhang<sup>1,\*</sup>

<sup>1</sup>State Key Laboratory of Natural & Biomimetic Drugs, School of Pharmaceutical Sciences, Peking University, Beijing 100191, China

<sup>2</sup>Calcium Signalling Group, Institute of Biochemistry and Molecular Biology I, University Medical Center Hamburg-Eppendorf, Martinistrasse 52, 20246 Hamburg, Germany

<sup>¶</sup>Equal contribution

\*Corresponding author

## Contents

|                                                                                                                                                                                                                                                                                                                                                                       |    |
|-----------------------------------------------------------------------------------------------------------------------------------------------------------------------------------------------------------------------------------------------------------------------------------------------------------------------------------------------------------------------|----|
| 1. <sup>1</sup> H NMR, <sup>31</sup> P NMR and HRMS of 5b-1 .....                                                                                                                                                                                                                                                                                                     | 2  |
| 2. <sup>1</sup> H NMR, <sup>31</sup> P NMR and HRMS of 5b-2 .....                                                                                                                                                                                                                                                                                                     | 3  |
| 3. HPLC, <sup>1</sup> H NMR, <sup>31</sup> P NMR and HRMS of P <sub>S</sub> <sup>1</sup> -cIDPRE-1 .....                                                                                                                                                                                                                                                              | 5  |
| 4. HPLC, <sup>1</sup> H NMR, <sup>31</sup> P NMR and HRMS of P <sub>S</sub> <sup>1</sup> -cIDPRE-2 .....                                                                                                                                                                                                                                                              | 7  |
| 5. <sup>1</sup> H NMR, <sup>31</sup> P NMR and HRMS of 5c-1 .....                                                                                                                                                                                                                                                                                                     | 9  |
| 6. <sup>1</sup> H NMR, <sup>31</sup> P NMR and HRMS of 5c-2 .....                                                                                                                                                                                                                                                                                                     | 10 |
| 7. HPLC, <sup>1</sup> H NMR, <sup>31</sup> P NMR and HRMS of P <sub>Se</sub> <sup>1</sup> -cIDPRE-1 .....                                                                                                                                                                                                                                                             | 12 |
| 8. HPLC, <sup>1</sup> H NMR, <sup>31</sup> P NMR and HRMS of P <sub>Se</sub> <sup>1</sup> -cIDPRE-2 .....                                                                                                                                                                                                                                                             | 14 |
| 9. <sup>1</sup> H NMR, <sup>31</sup> P NMR and HRMS of 9b-1 .....                                                                                                                                                                                                                                                                                                     | 16 |
| 10. <sup>1</sup> H NMR, <sup>31</sup> P NMR and HRMS of 9b-2 .....                                                                                                                                                                                                                                                                                                    | 17 |
| 11. HPLC, <sup>1</sup> H NMR, <sup>31</sup> P NMR and HRMS of P <sub>S</sub> <sup>2</sup> -cIDPRE-1 .....                                                                                                                                                                                                                                                             | 19 |
| 12. HPLC, <sup>1</sup> H NMR, <sup>31</sup> P NMR and HRMS of P <sub>S</sub> <sup>2</sup> -cIDPRE-2 .....                                                                                                                                                                                                                                                             | 21 |
| 13. <sup>1</sup> H NMR, <sup>31</sup> P NMR and HRMS of 9c-1 .....                                                                                                                                                                                                                                                                                                    | 23 |
| 14. <sup>1</sup> H NMR, <sup>31</sup> P NMR and HRMS of 9c-2 .....                                                                                                                                                                                                                                                                                                    | 24 |
| 15. HPLC, <sup>1</sup> H NMR, <sup>31</sup> P NMR and HRMS of P <sub>Se</sub> <sup>2</sup> -cIDPRE-1 .....                                                                                                                                                                                                                                                            | 26 |
| 16. HPLC, <sup>1</sup> H NMR, <sup>31</sup> P NMR and HRMS of P <sub>Se</sub> <sup>2</sup> -cIDPRE-2 .....                                                                                                                                                                                                                                                            | 28 |
| 17. Bioassay results of P <sub>S</sub> <sup>1</sup> -cIDPRE-1 and P <sub>S</sub> <sup>1</sup> -cIDPRE-2 .....                                                                                                                                                                                                                                                         | 30 |
| 18. Procedures for preparation of P <sub>S</sub> <sup>1</sup> -cIDPRE-1, P <sub>S</sub> <sup>1</sup> -cIDPRE-2, P <sub>Se</sub> <sup>1</sup> -cIDPRE-1, P <sub>Se</sub> <sup>1</sup> -cIDPRE-2, P <sub>S</sub> <sup>2</sup> -cIDPRE-1, P <sub>S</sub> <sup>2</sup> -cIDPRE-2, P <sub>Se</sub> <sup>2</sup> -cIDPRE-1 and P <sub>Se</sub> <sup>2</sup> -cIDPRE-2 ..... | 32 |

### 1. $^1\text{H}$ NMR, $^{31}\text{P}$ NMR and HRMS of 5b-1

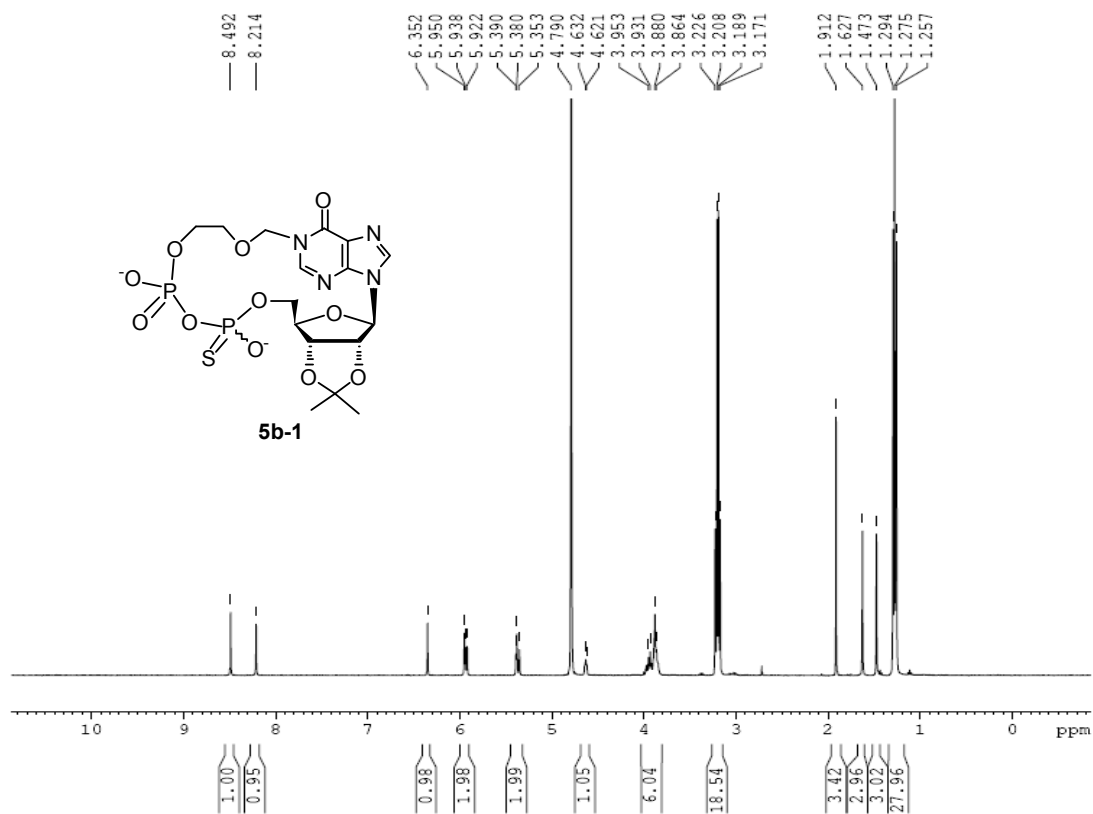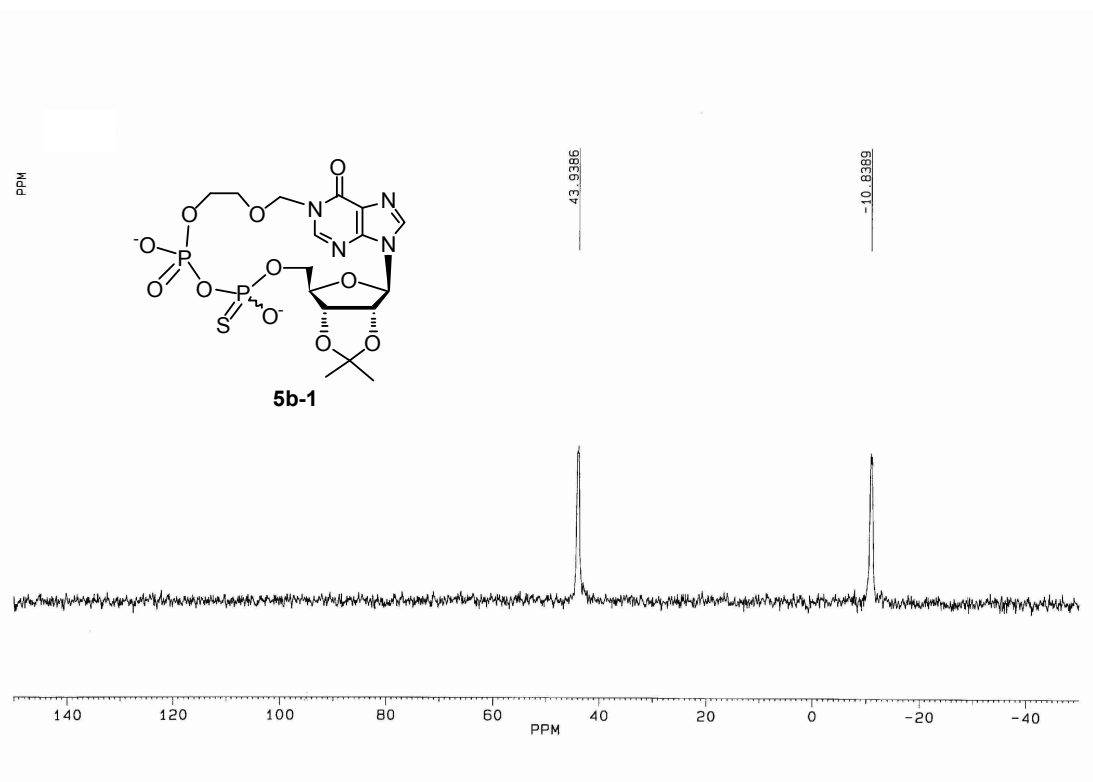

Bruker APEX IV FT\_MS (7.0 T) Report (all)

**Analysis Info** 北京大学医药卫生分析中心 Acquisition Da 11/12/2009 10:37:33  
 Analysis Nam C:\data\_sample\ESI\_091201\_10\ESI\_S1\_20091211\NEG2  
 Method Operator bpfxsh@bjmu.edu.cn; Tel: 010\_82801437  
 Sample Name Instrument FT\_MS\_Bruker APEX IV (7.0 T)  
 Comment ESI C16H22N4O11P2S1 MW 540.0481  
 CAL CLB22N3 C24H33N19O9 MW 731.2709  
 CAL588; 226.16718;249.15695;340.25887;301.14158;  
 362.24081;391.28483;413.26647;453.34353;  
 475.32548;509.25407;509.25407;566.42760;  
 588.40954;679.51166;701.49361;826.47121;  
 in 1:1 H<sub>2</sub>O:MeOH; CapExit 150V; m/z 150-2880;  
 mg/mL; 150uL/h

**Acquisition Result:** Exact Mass Measured Mass Error (mm/e) Error (ppm) Description  
 539.04083 539.04012 0.71 1.31 M-H;<sup>+</sup>e

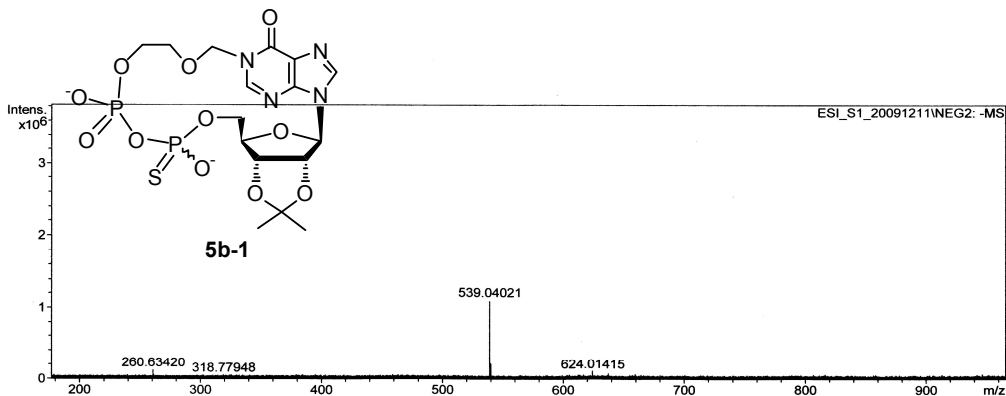

Bruker Daltonics DataAnalysis 3.4

printed: 11/12/2009 10:41:00

Page 1 of 1

2. <sup>1</sup>H NMR, <sup>31</sup>P NMR and HRMS of 5b-2

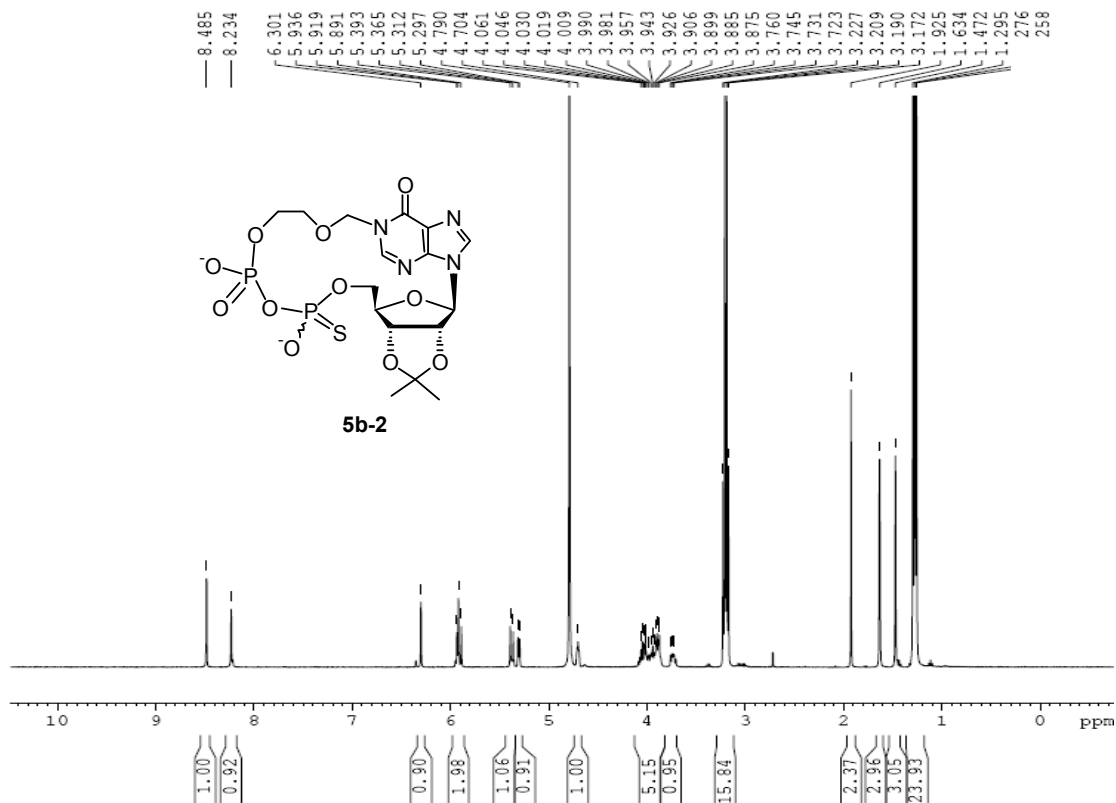

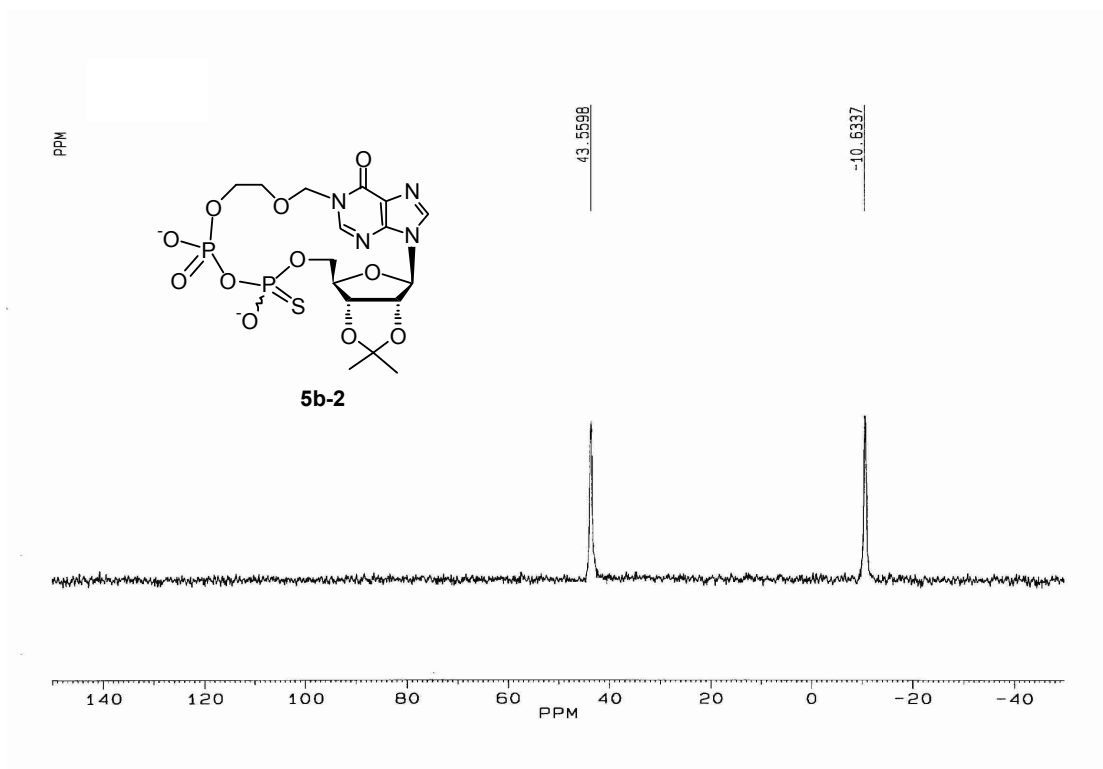

Bruker APEX IV FT\_MS (7.0 T) Report (all)

**Analysis Info** 北京大学医药卫生分析中心 Acquisition Date 07/12/2009 16:01:07  
 Analysis Name C:\data\_sample\ESI\_091201\_10\ESI\_S2\_20091207\NEG\_3  
 Method Operator bpxsh@bjmu.edu.cn; Tel: 010\_82801437  
 Sample Name Instrument FT\_MS\_Bruker APEX IV (7.0 T)  
 Comment ESI C<sub>16</sub>H<sub>22</sub>N<sub>4</sub>O<sub>11</sub>P<sub>2</sub>S<sub>1</sub> MW 540.0481  
 CAL588; 226.16718;249.15695;340.25887;301.14158;  
 362.24081;391.28483;413.26647;453.34353;  
 475.32548;509.25407;509.25407;566.42760;  
 588.40954;679.51166;701.49361;826.47121;  
 in 1:1 H<sub>2</sub>O:MeOH; CapExit 150V; m/z 150-2880;  
 mg/mL; 150uL/h

| Acquisition Result: | Exact Mass | Measured Mass | Error (mm/e) | Error (ppm) | Description |
|---------------------|------------|---------------|--------------|-------------|-------------|
|---------------------|------------|---------------|--------------|-------------|-------------|

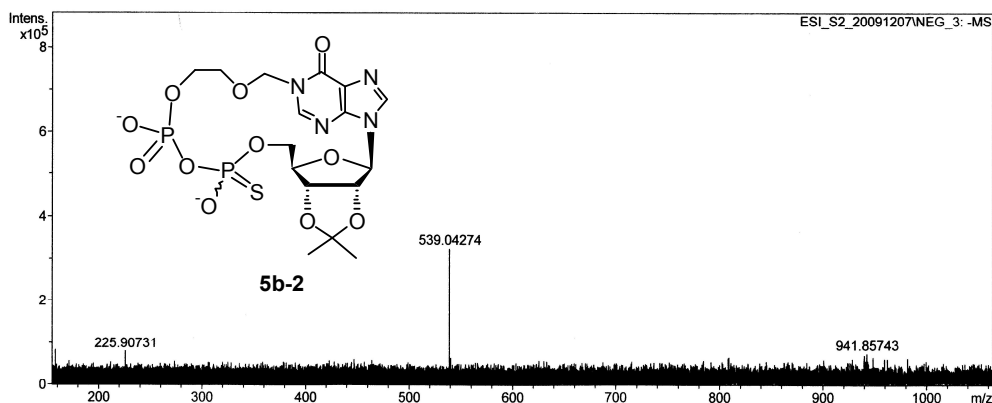

### 3. HPLC, $^1\text{H}$ NMR, $^{31}\text{P}$ NMR and HRMS of $\text{P}_S^1\text{-cIDPRE-1}$

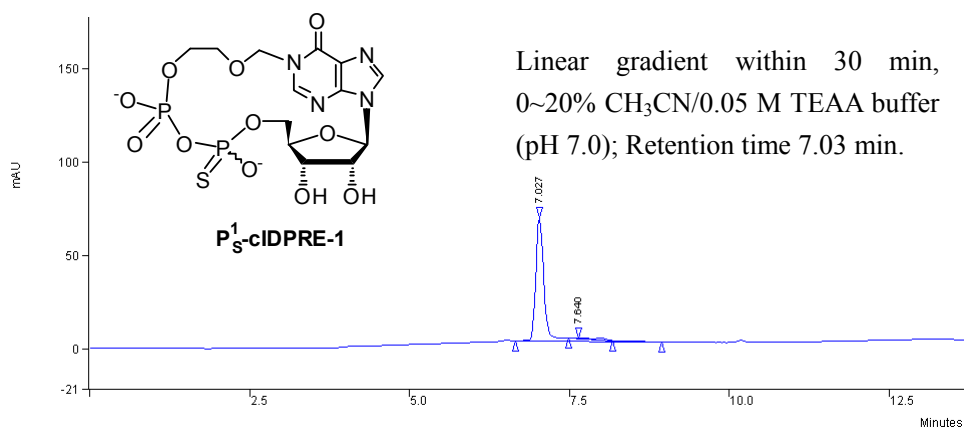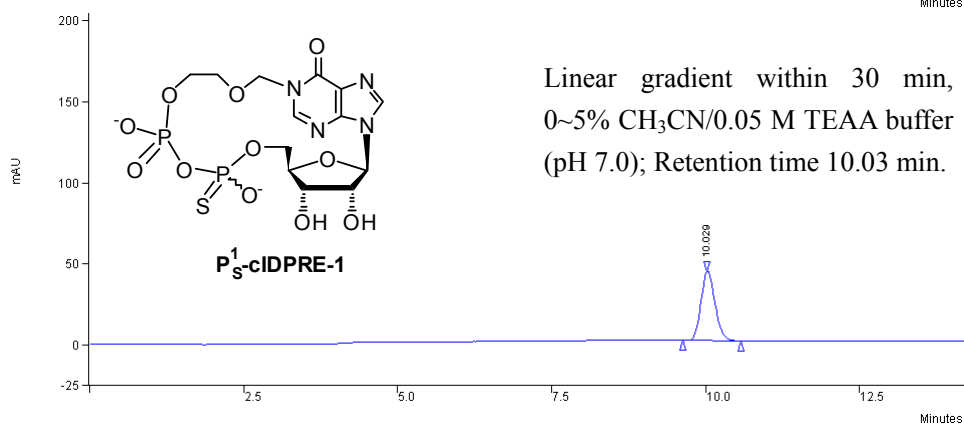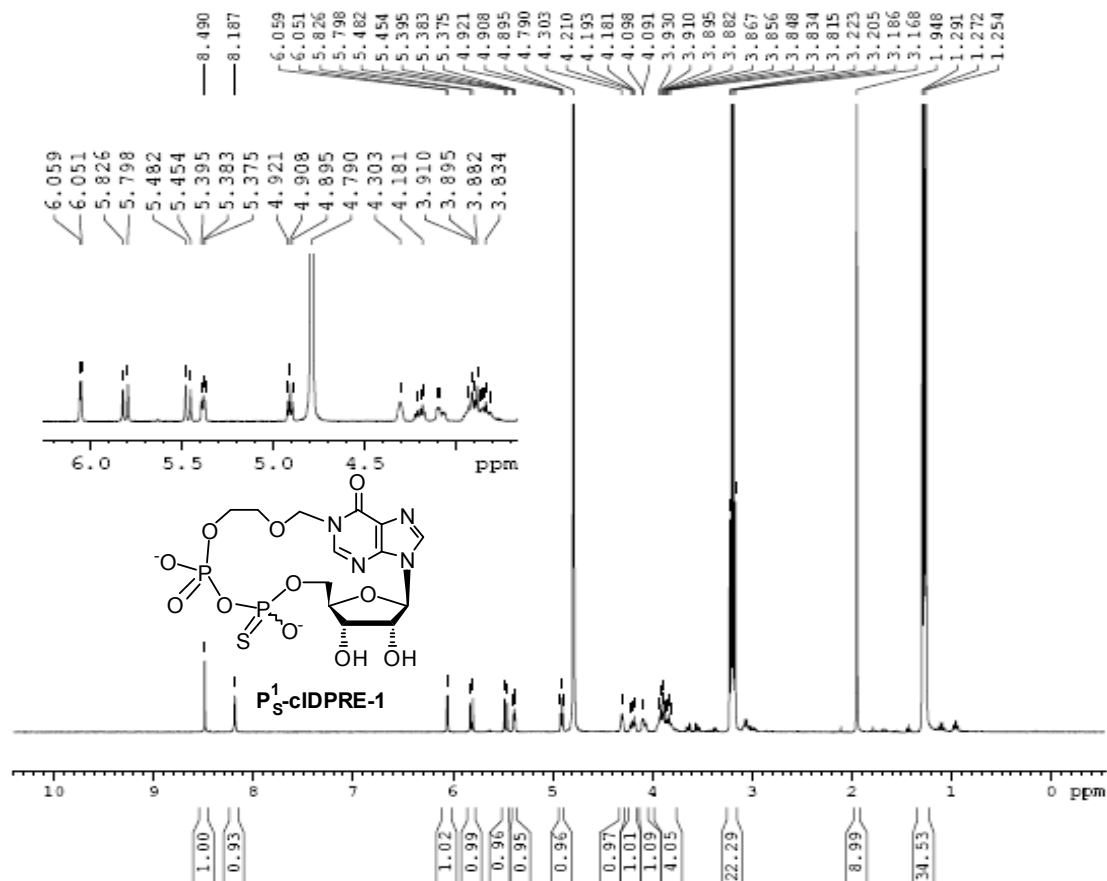

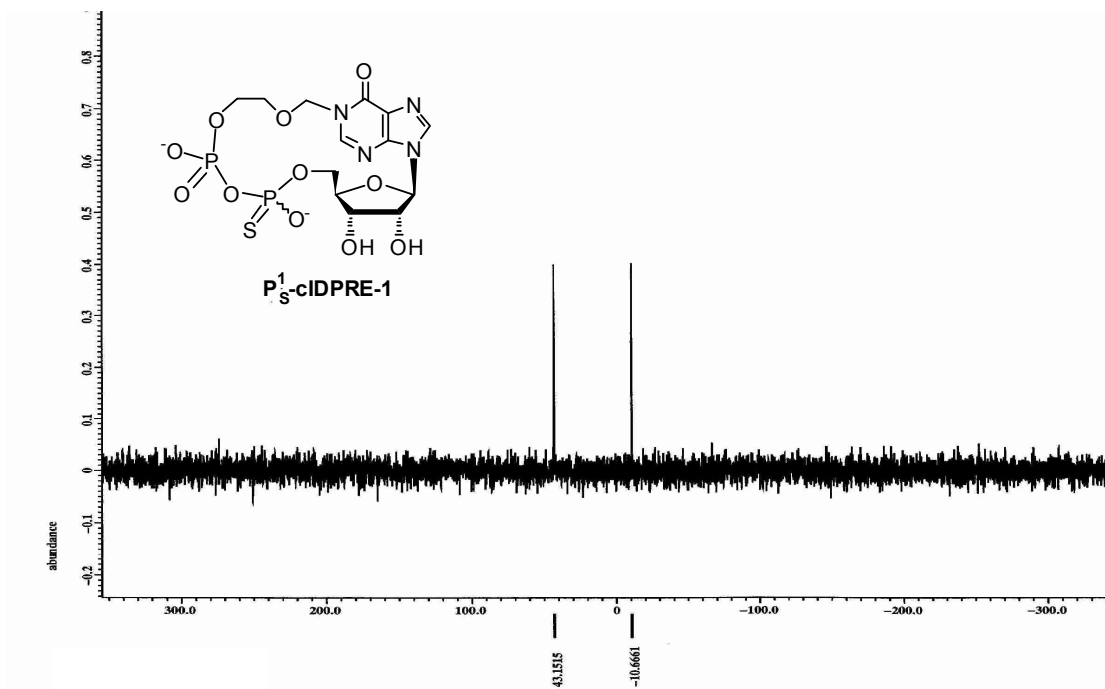

Bruker APEX IV FT\_MS (7.0 T) Report (all)

**Analysis Info** 北京大学医药卫生分析中心 Acquisition Da 28/10/2009 16:45:14  
 Analysis Nam C:\data\_sample\ESI\_091021\_30\ESI\_S41\_ZM\_20091027\SAMPLE3  
 Method Operator bpfxsh@bjmu.edu.cn; Tel: 010\_82801437  
 Sample Name Instrument FT\_MS\_Bruker APEX IV (7.0 T)  
 Comment ESI C13H18N4O11P2S1 MW 500.0168  
 CAL588; 226.16718;249.15695;340.25887;301.14158;  
 362.24081;391.28483;413.26647;453.34353;  
 475.32548;509.25407;509.25407;566.42760;  
 589.40954;679.51166;701.49361;826.47121;  
 in 1:1 Tol:MeOH; CapExit 150V; m/z 150-1500; 1024K; D1 2s  
 0.05 mg/mL; 150uL/h

| Acquisition Result: | Exact Mass | Measured Mass | Error (mm/e) | Error (ppm) | Description         |
|---------------------|------------|---------------|--------------|-------------|---------------------|
|                     | 499.00953  | 499.00889     | 0.64         | 1.28        | M-H; <sup>+</sup> e |

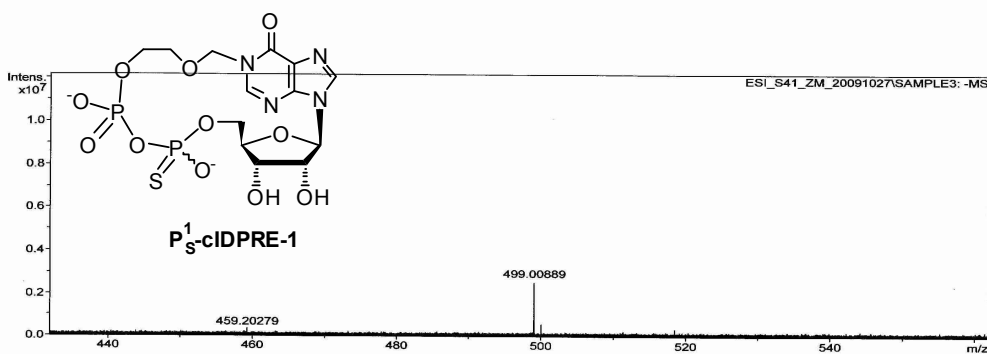

#### 4. HPLC, $^1\text{H}$ NMR, $^{31}\text{P}$ NMR and HRMS of $\text{P}_s^1\text{-cIDPRE-2}$

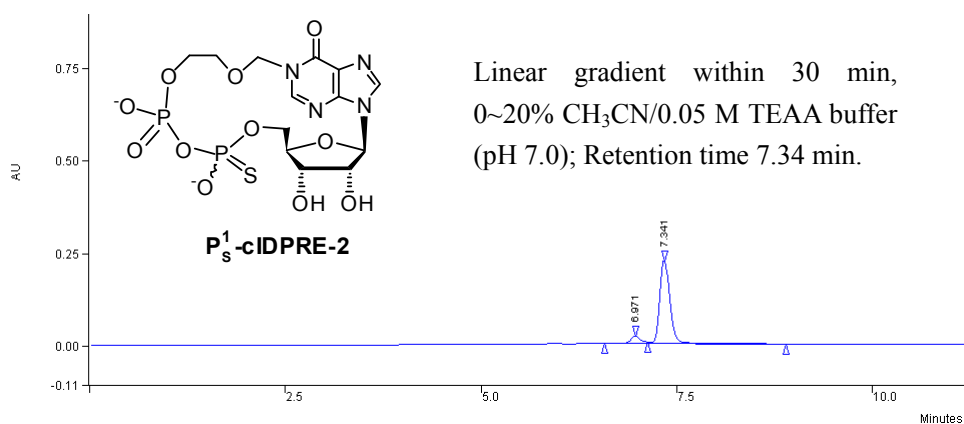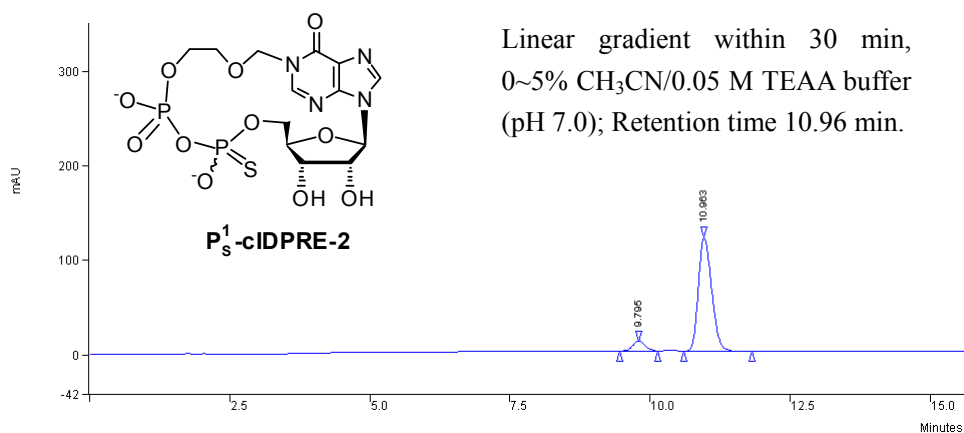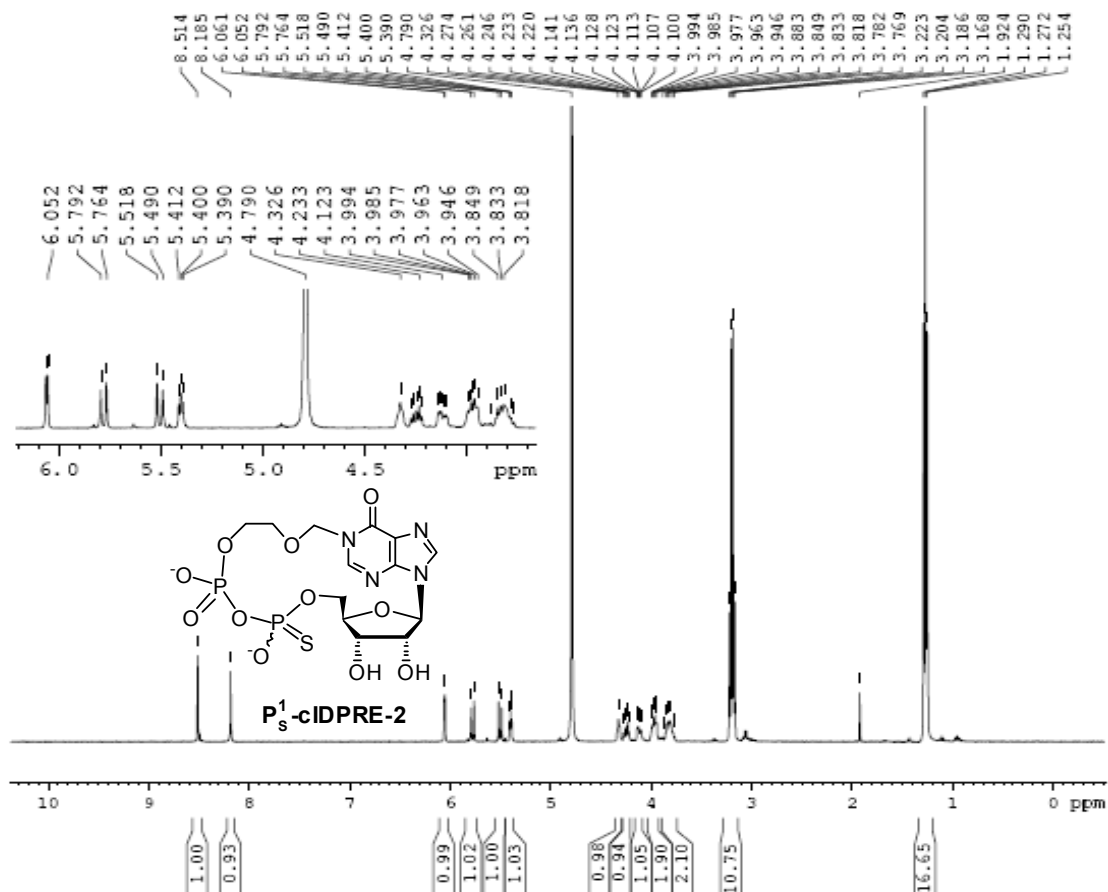

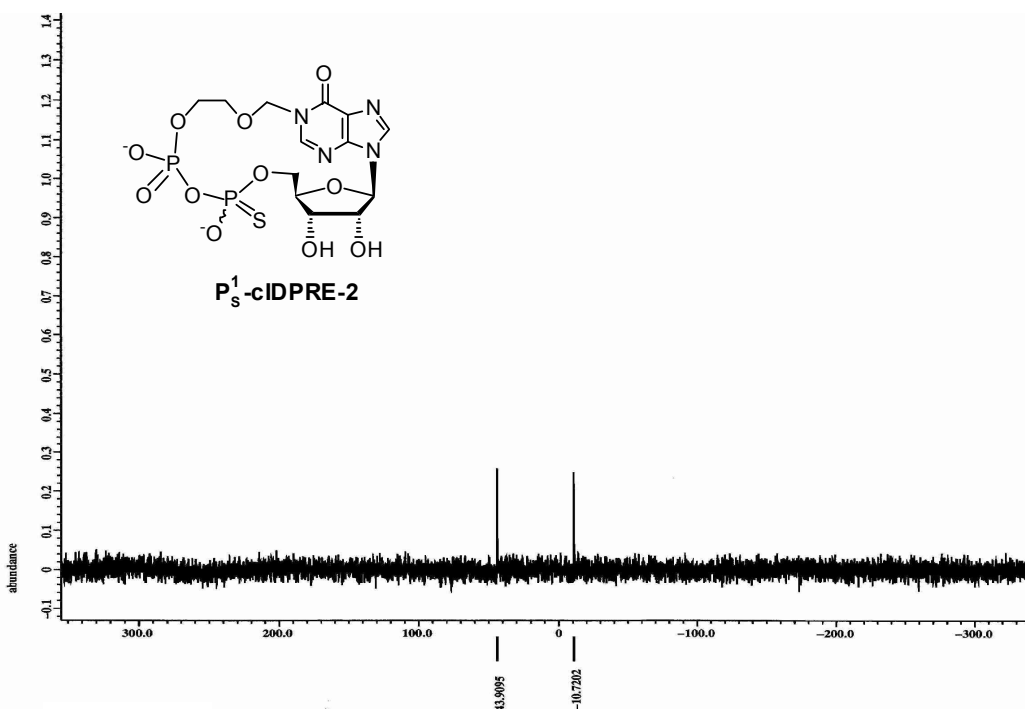

### Bruker APEX IV FT\_MS (7.0 T) Report (all)

**Analysis Info** 北京大学医药卫生分析中心 Acquisition Da 23/10/2009 13:01:34  
 Analysis Nam C:\data\_sample\ESI\_091021\_30\WFGESI\_S42\_ZM\_20091023\5  
 Method Operator bpxsh@bjmu.edu.cn; Tel: 010\_82801437  
 Sample Name Instrument FT\_MS\_Bruker APEX IV (7.0 T)  
 Comment NEGESI C13H18N4O11P2S1 MW 500.0168  
 CAL588; 226.16718;249.15695;340.25887;301.14158;  
 362.24081;391.28483;413.26647;453.34353;  
 475.32548;509.25407;509.25407;566.42760;  
 588.40954;679.51166;701.49361;826.47121;  
 in 1:1 Tol:MeOH; CapExit 150V; m/z 150-1500; 1024K; D1 2s  
 0.05 mg/mL; 150uL/h

| Acquisition Result: | Exact Mass | Measured Mass | Error (mm/e) | Error (ppm) | Description         |
|---------------------|------------|---------------|--------------|-------------|---------------------|
|                     | 499.00953  | 499.00768     | 1.85         | 3.70        | M-H; <sup>+</sup> e |

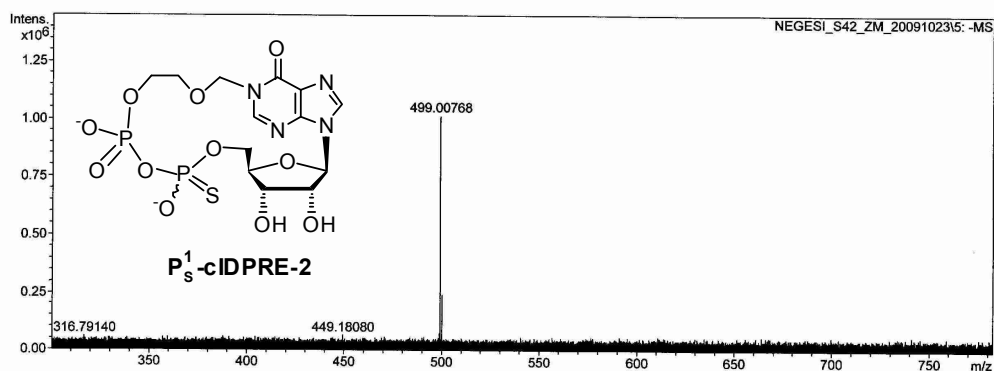



### 5. $^1\text{H}$ NMR, $^{31}\text{P}$ NMR and HRMS of 5c-1

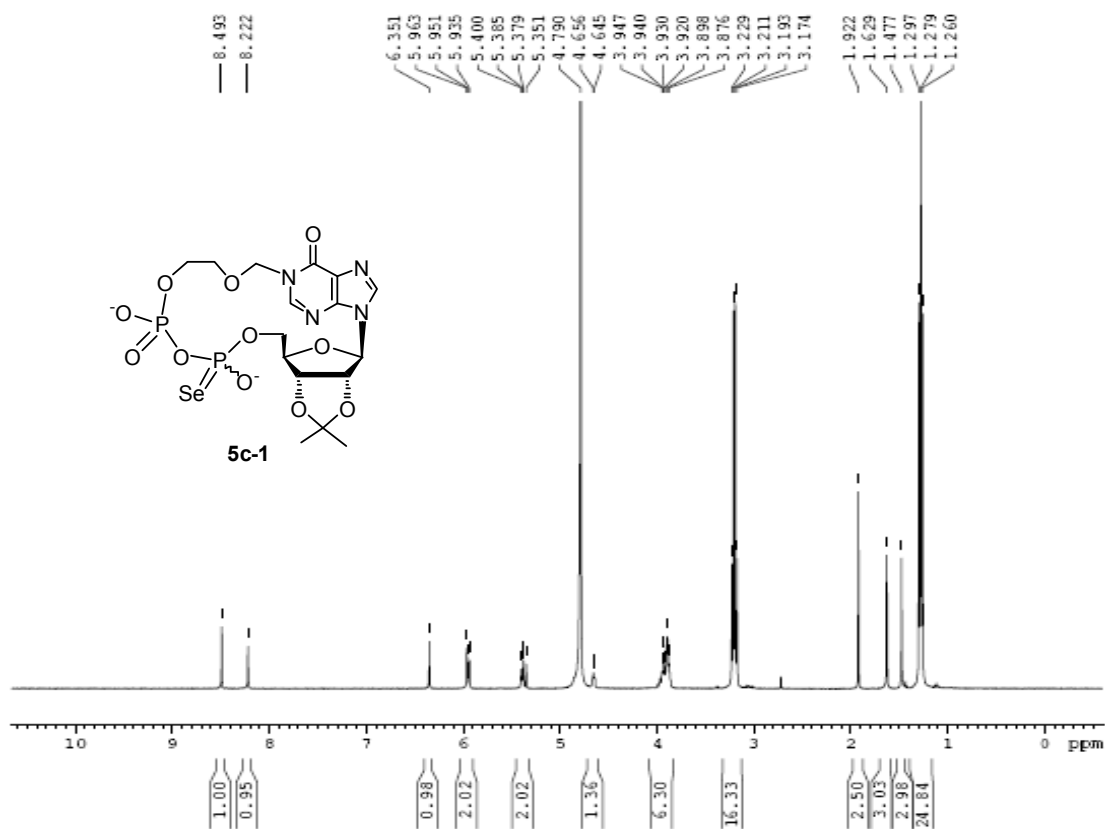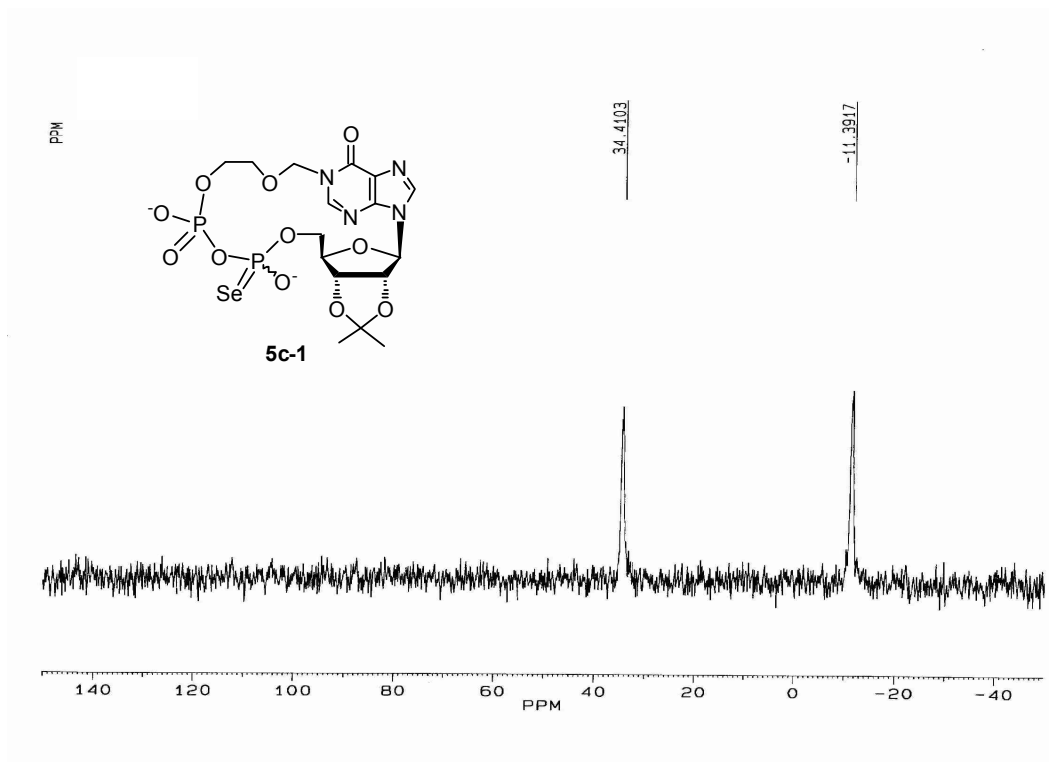

BJMU - BRUKER APEX IV FT-MS (7.0T) Spectrum Report

Analysis Info 北京大学医药卫生分析中心 Acquisition Date 07/12/2009 15:12:53  
 Analysis Name C:\data\_sample\ESI\_091201\_10\ESI\_SE1\_20091207\NEG\_4 Operator bpfxsh@bjmu.edu.cn  
 Instrument FT\_MS\_Bruker APEX IV (7.0 T)

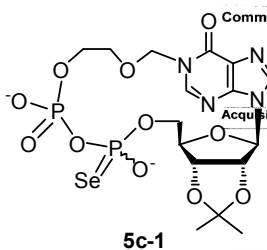

Comment ESI C16H22N4O11P2Se1 MW 587.9926  
 CAL588; 226.16718;249.15695;340.25887;301.14158;  
 362.24081;391.28483;413.26647;453.34353;  
 475.32549;509.25407;509.25407;566.42760;  
 586.40364;579.51166;701.49301;826.47121;  
 in 1:1 H<sub>2</sub>O:MeOH; CapExit 150V; m/z 150-2880;  
 mg/mL; 150uL/h

Acquisition Result: Exact Mass Measured Mass Error (mDa) Error (ppm) Description  
**586.98473** **586.98637** **-1.64** **-2.79** **M-H;+e**

| Sum Formula                 | Sigma | m/z       | Err [ppm] | Mean Err [ppm] | Err [mDa] | rdb  | N Rule | e <sup>-</sup> |
|-----------------------------|-------|-----------|-----------|----------------|-----------|------|--------|----------------|
| C 16 H 21 N 4 O 11 P 2 Se 1 | 0.010 | 586.98528 | -1.86     | -1.93          | -1.09     | 9.50 | ok     | even           |
| C 15 H 25 O 15 P 2 Se 1     | 0.010 | 586.98394 | -4.14     | -4.06          | -2.43     | 4.50 | ok     | even           |
| C 14 H 21 N 1 O 19 Se 1     | 0.011 | 586.98785 | 2.52      | 2.63           | 1.48      | 5.00 | ok     | odd            |
| C 11 H 23 O 22 Se 1         | 0.021 | 586.98517 | -2.04     | -1.95          | -1.20     | 0.50 | ok     | even           |

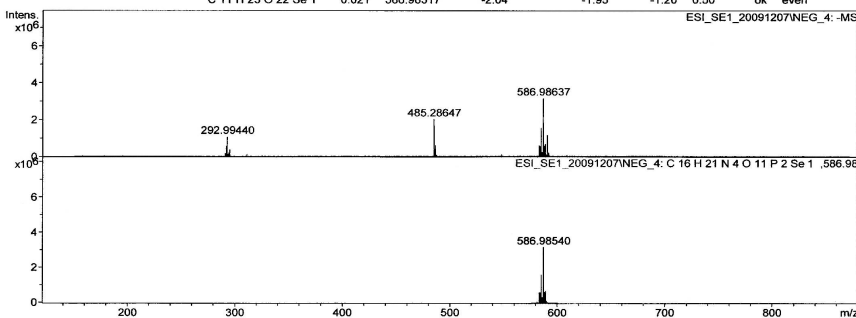

6. <sup>1</sup>H NMR, <sup>31</sup>P NMR and HRMS of 5c-2

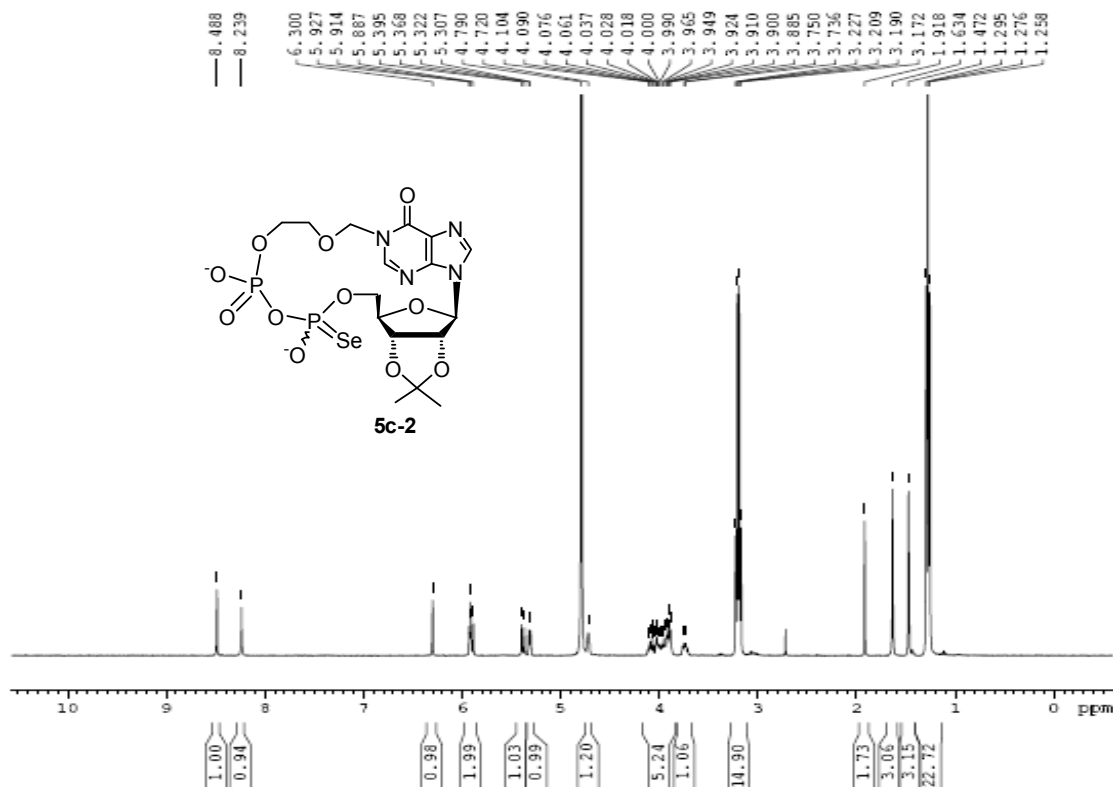

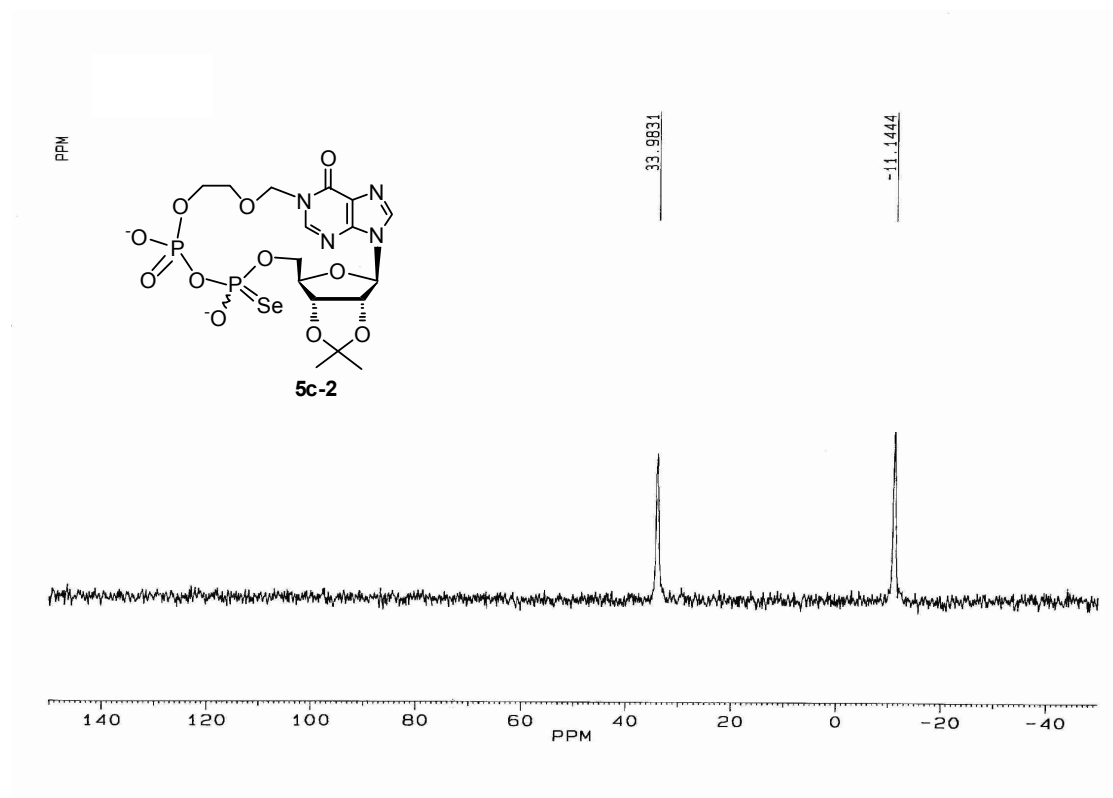

BJMU - BRUKER APEX IV FT-MS (7.0T) Spectrum Report

**Analysis Info**      北京大学医药卫生分析中心      **Acquisition Date**      07/12/2009 15:36:26  
**Analysis Name**      C:\data\_sample\ESI\_091201\_10\ESI\_SE2\_20091207\NEG\_4      **Operator**      bpfxsh@bjmu.edu.cn  
**Instrument**      FT\_MS\_Bruker APEX IV (7.0 T)

**Comment**      ESI      C16H22N4O11P2SE1      MW 587.9926  
 CAL588; 226.16718;249.15695;340.25887;301.14158;  
 362.24081;391.28483;413.26647;453.34353;  
 475.32548;509.25407;509.25407;566.42760;  
 588.40954;679.51166;701.49361;826.47121;  
 H2O:MeOH; CapExit 150V; m/z 150-2880;  
 mg/mL; 150uL/h

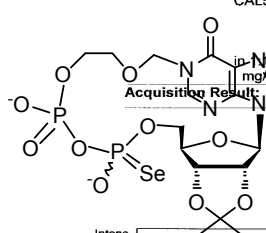

**Acquisition Result:**      **Exact Mass**      **Measured Mass**      **Error (mDa)**      **Error (ppm)**      **Description**  
 586.98473      586.98608      -1.35      -2.30      M-H;+e

| Sum Formula                 | Sigma | m/z       | Err [ppm] | Mean Err [ppm] | Err [mDa] | rdb  | N Rule | e <sup>-</sup> |
|-----------------------------|-------|-----------|-----------|----------------|-----------|------|--------|----------------|
| C 16 H 21 N 4 O 11 P 2 Se 1 | 0.022 | 586.98528 | -1.37     | -1.18          | -0.80     | 9.50 | ok     | even           |
| C 15 H 25 O 15 P 2 Se 1     | 0.024 | 586.98394 | -3.65     | -3.32          | -2.14     | 4.50 | ok     | even           |
| C 14 H 21 N 1 O 19 Se 1     | 0.026 | 586.98785 | 3.01      | 3.38           | 1.77      | 5.00 | ok     | odd            |

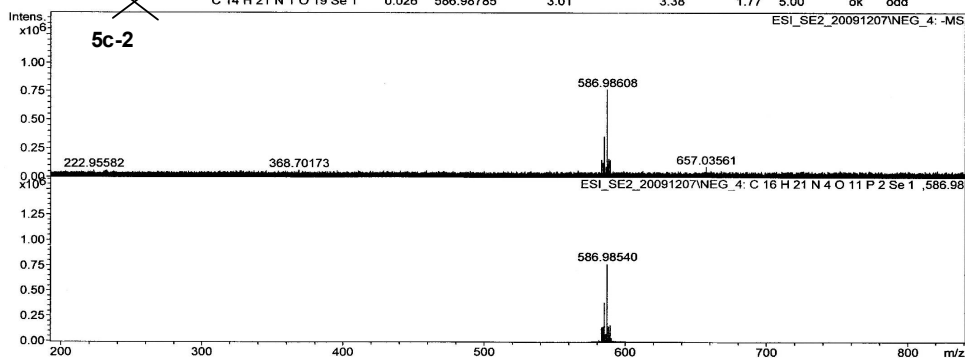

## 7. HPLC, <sup>1</sup>H NMR, <sup>31</sup>P NMR and HRMS of P<sup>1</sup><sub>Se</sub>-cIDPRE-1

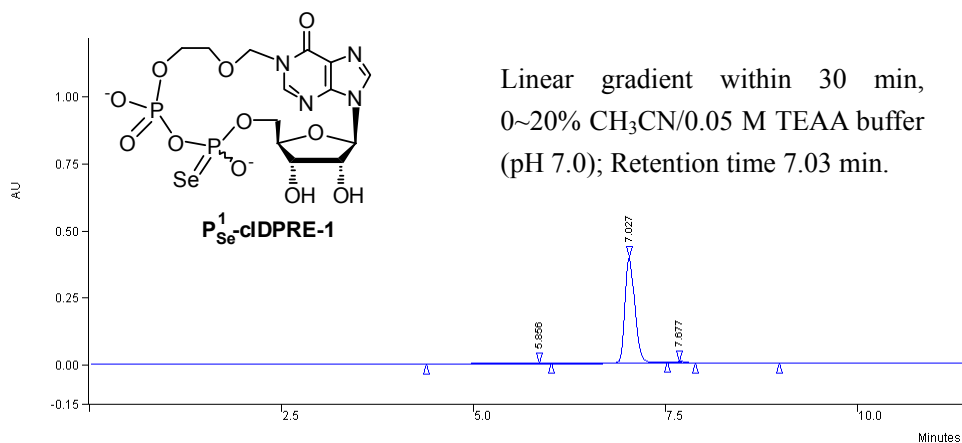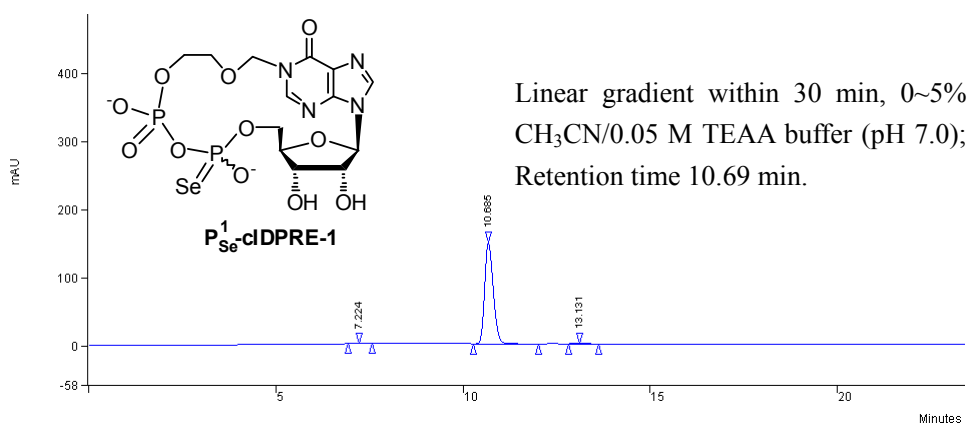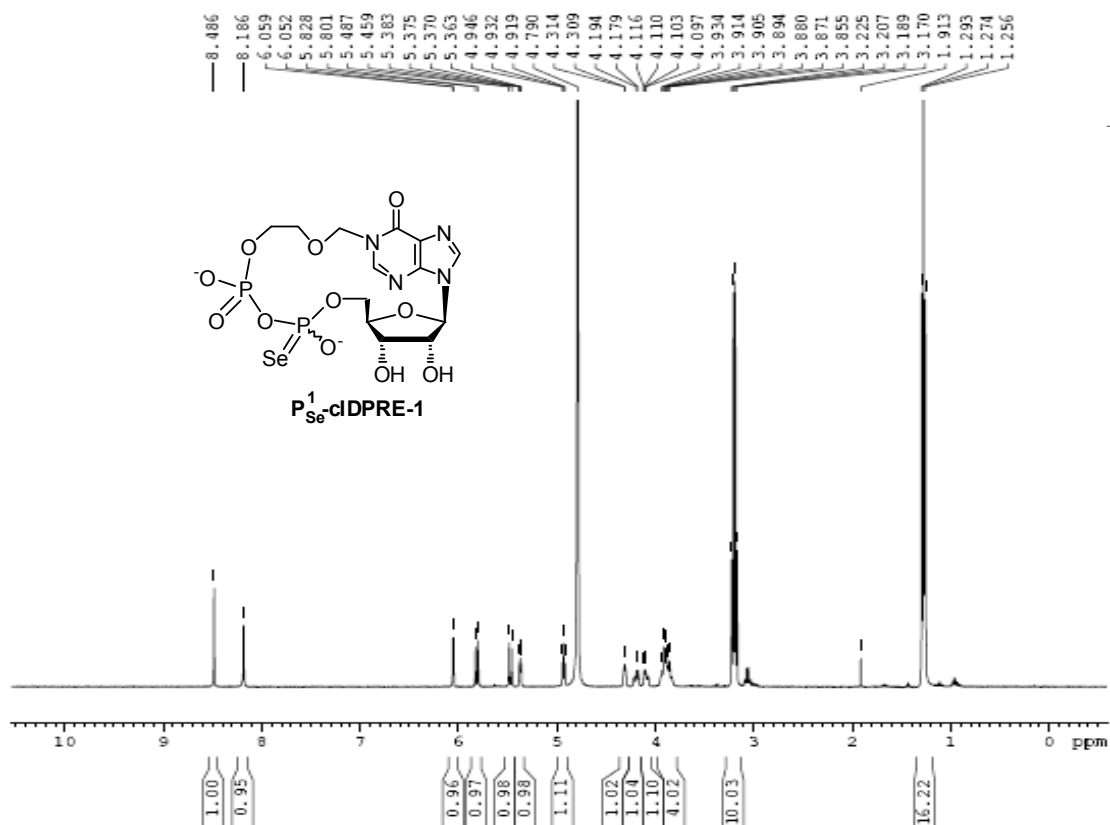

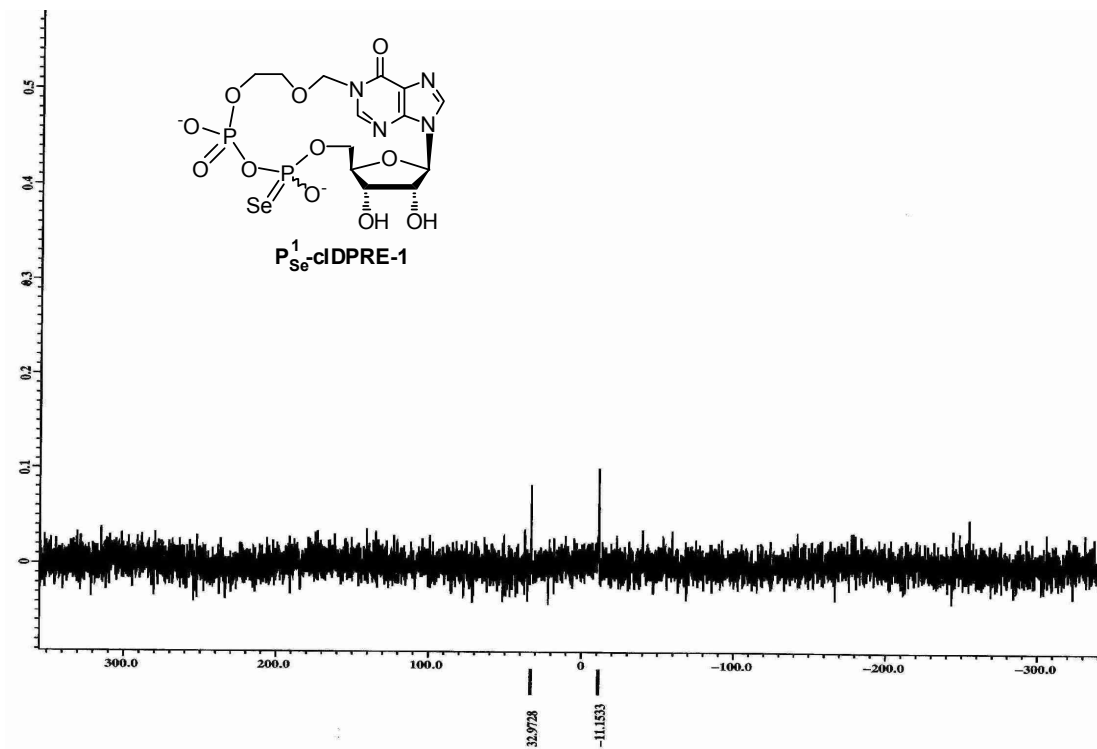

### Bruker APEX IV FT\_MS (7.0 T) Report (all)

**Analysis Info** 北京大学医药卫生分析中心 Acquisition Date 23/10/2009 13:14:41  
Analysis Name C:\data\_sample\ESI\_091021\_30\NEGESI\_E81\_ZM\_20091023\2 Operator bpxsh@bjmu.edu.cn; Tel: 010\_82801437  
Method FT\_MS Instrument FT\_MS\_Bruker APEX IV (7.0 T)  
Sample Name  
Comment NEGESI C13H18N4O11P2SE1 MW 547.9613  
CAL588; 226.16718;249.15695;340.25887;301.14158;  
362.24081;391.28483;413.26647;453.34353;  
475.32548;509.25407;509.25407;566.42760;  
588.40954;679.51166;701.49361;826.47121;  
in 1:1 Tol:MeOH; CapExit 150V; m/z 150-1500; 1024K; D1 2s  
0.05 mg/mL; 150uL/h

| Acquisition Result: | Exact Mass | Measured Mass | Error (mm/e) | Error (ppm) | Description         |
|---------------------|------------|---------------|--------------|-------------|---------------------|
|                     | 546.95343  | 546.95088     | 2.55         | 4.66        | M-H; <sup>+</sup> e |

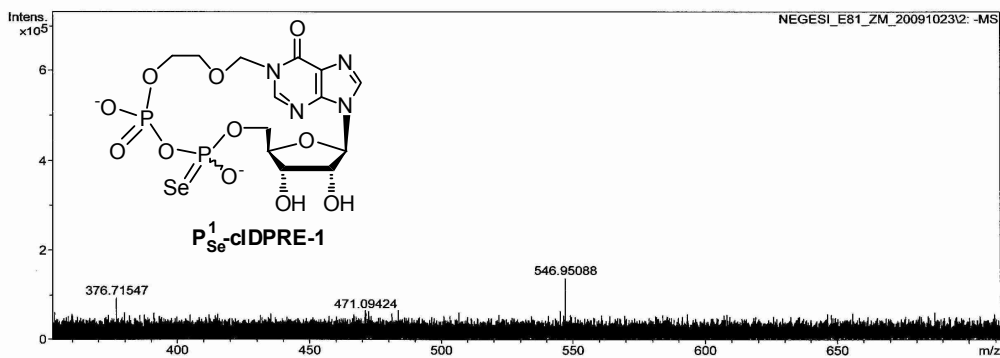

## 8. HPLC, $^1\text{H}$ NMR, $^{31}\text{P}$ NMR and HRMS of $\text{P}_{\text{Se}}^1\text{-cIDPRE-2}$

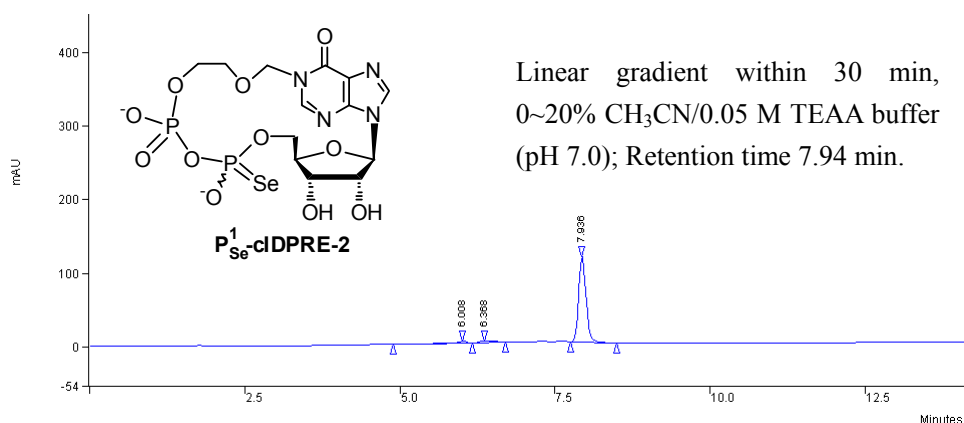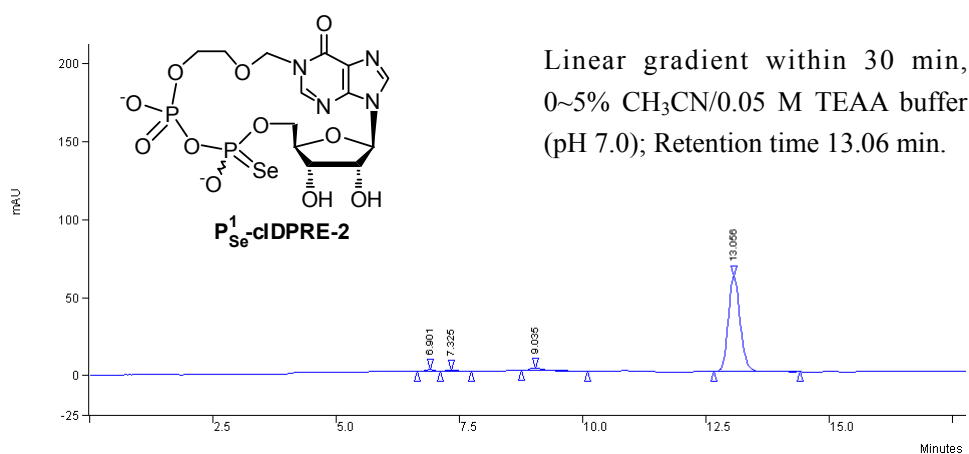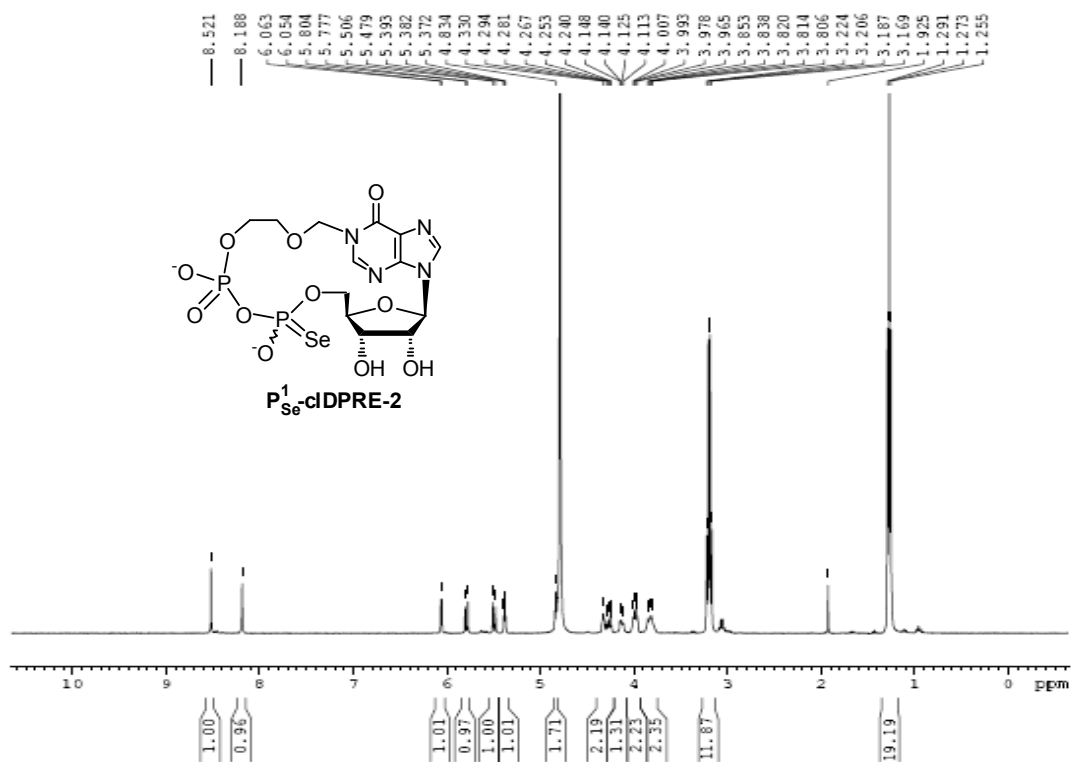

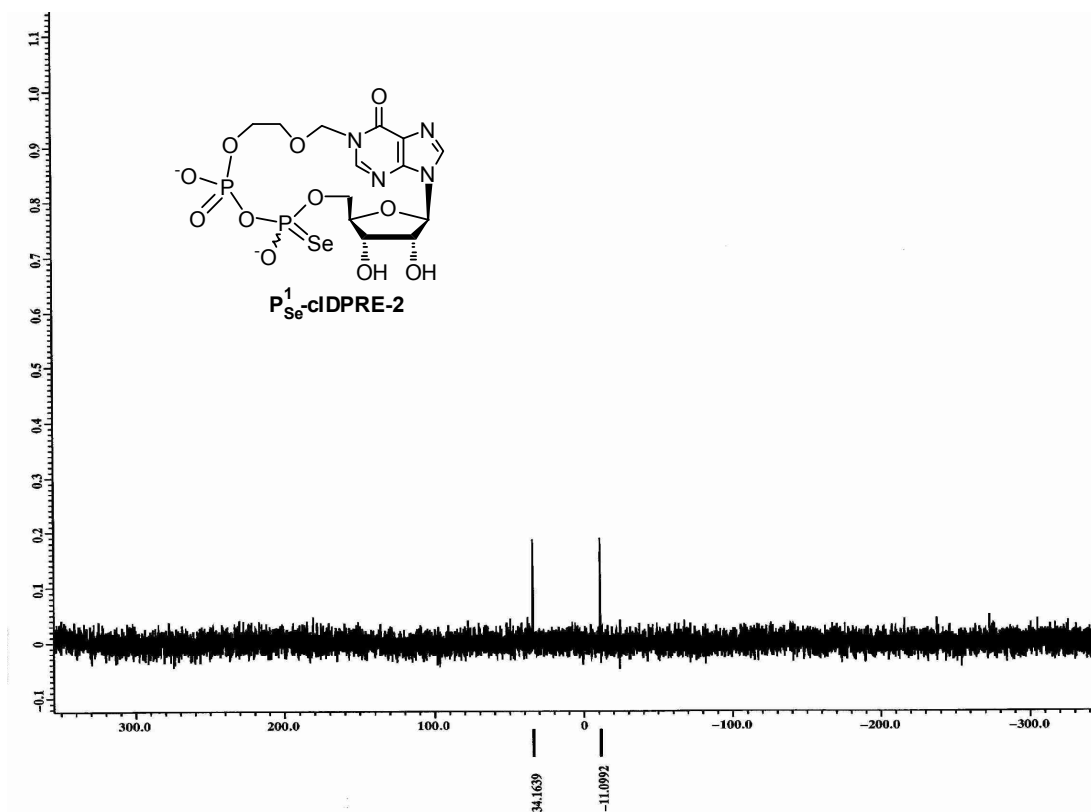

Bruker APEX IV FT\_MS (7.0 T) Report (all)

**Analysis Info** 北京大学医药卫生分析中心 Acquisition Date 28/10/2009 16:27:16  
 Analysis Name C:\data\_sample\ESI\_091021\_30\ESI\_E81\_ZM\_20091027\SAMPLE8 Operator bpfxsh@bjmu.edu.cn; Tel: 010\_82801437  
 Method FT\_MS\_Bruker APEX IV (7.0 T)  
 Sample Name  
 Comment ESI C13H18N4O11P2SE1 MW 547.9613  
 CAL588; 226.16718;249.15695;340.25887;301.14158;  
 352.24081;391.28483;413.26647;453.34353;  
 475.32548;509.25407;509.25407;566.42760;  
 588.40954;679.51165;701.49361;826.47121;  
 in 1:1 Tol:MeOH; CapExit 150V; m/z 150-1500; 1024K; D1 2s  
 0.05 mg/mL; 150uL/h

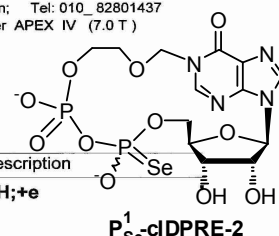

| Acquisition Result: | Exact Mass | Measured Mass | Error (mm/e) | Error (ppm) | Description         |
|---------------------|------------|---------------|--------------|-------------|---------------------|
|                     | 546.95343  | 546.95088     | 2.55         | 4.66        | M-H; <sup>+</sup> e |

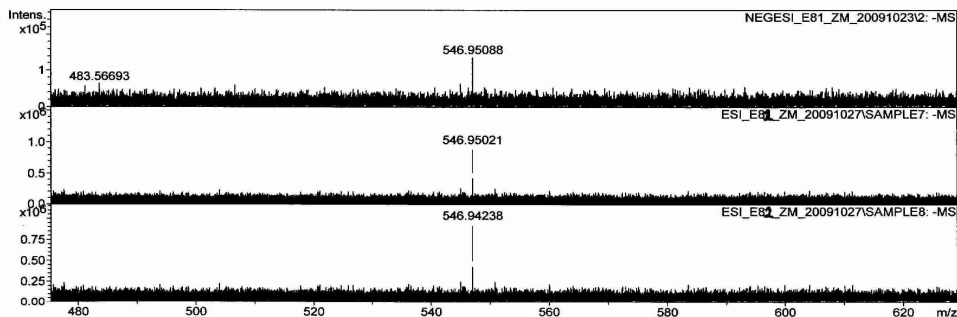

### 9. $^1\text{H}$ NMR, $^{31}\text{P}$ NMR and HRMS of 9b-1

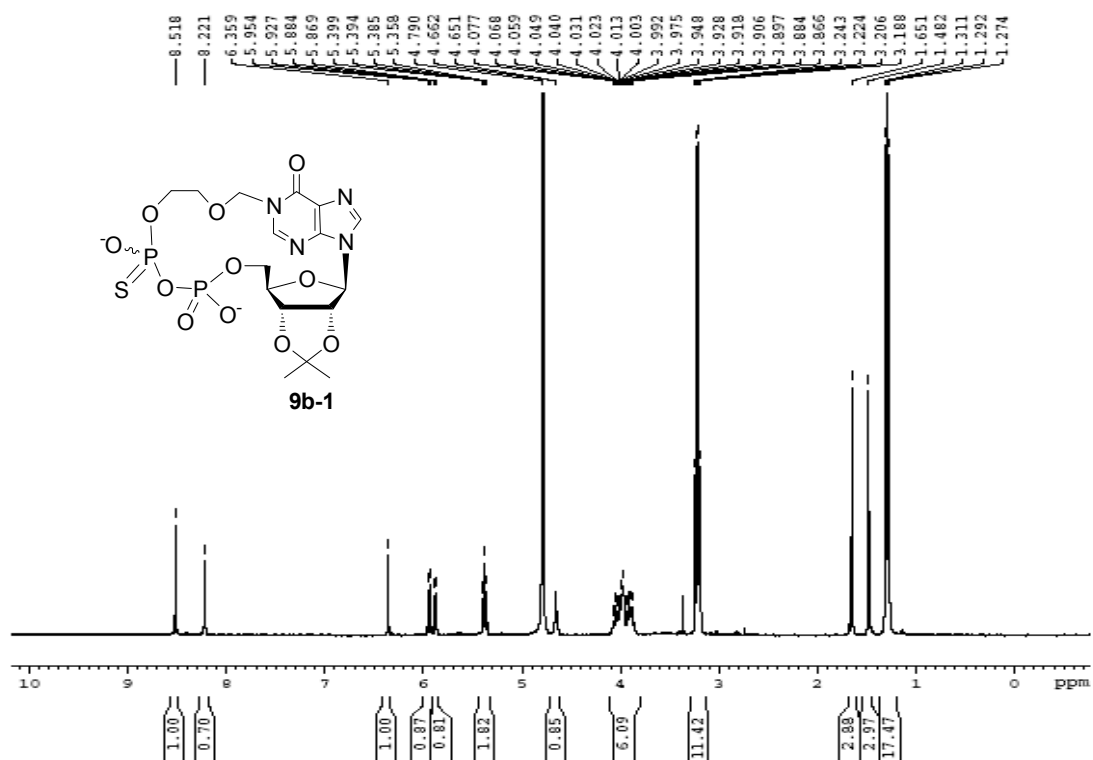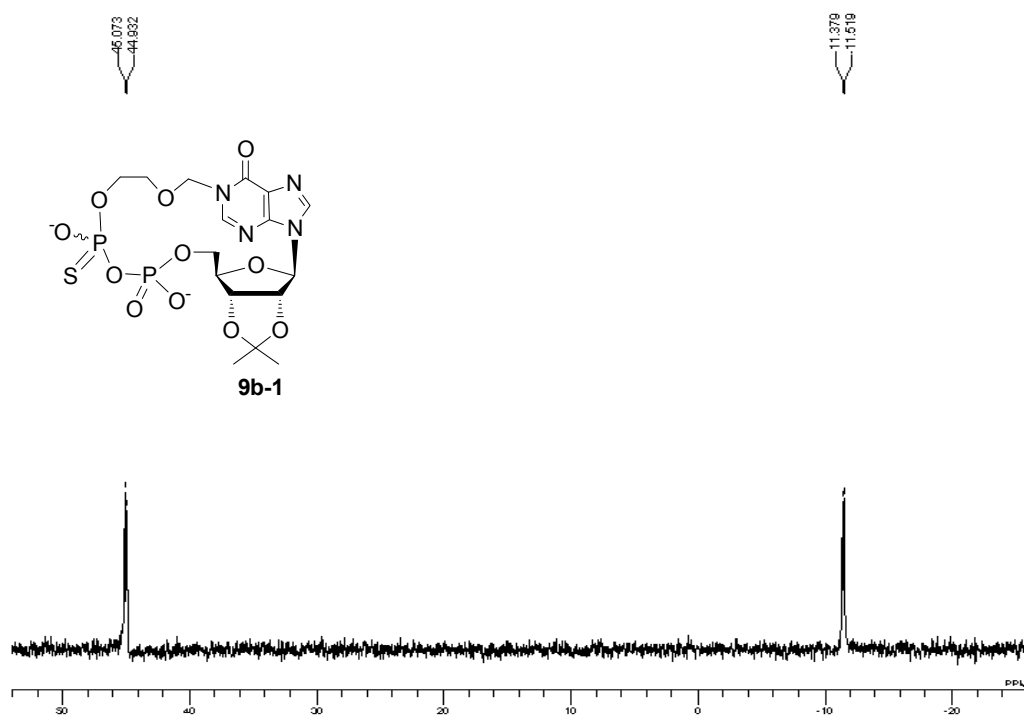



BJMU - BRUKER APEX IV FT-MS (7.0T) Spectrum Report

Analysis Info  Acquisition Date 29/03/2011 10:23:15  
 Analysis Name C:\data\_sample\ESI\_20110320\_30\ESI\_PS\_8\_1\_20110329\NE Operator bpxsh@bjmu.edu.cn  
 G\_1 Instrument FT\_MS\_Bruker APEX IV (7.0 T)

Comment ESI C16H22N4O11P2S1 MW 540.0481  
 CALSAME; NEG 216.98461; 615.12089; 833.11525  
 POS 399.14451; 617.13639; 835.12827; 1053.12015; 1271.11203; 1489.10391; 1707.09579320.01451;  
 335.99207; 414.00562; 509.25407; 826.47121351; 96445□  
 in 1:1 H2O:MeOH; CapExit 150V; m/z 150-3000; 1024K;  
 D1= 2s ; ns=8 100uL/h

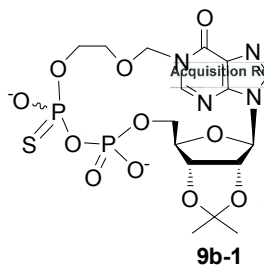

| Exact Mass                 | Measured Mass | Error (mDa) | Error (ppm) | Description    |
|----------------------------|---------------|-------------|-------------|----------------|
| Sum Formula                | Sigma         | m/z         | Err [ppm]   | Mean Err [ppm] |
| C 26 H 15 N 5 O 3 P 2 S 1  | 0.050         | 539.03763   | -3.20       | -3.70          |
| C 28 H 17 N 2 O 4 P 2 S 1  | 0.054         | 539.03897   | -0.70       | -1.12          |
| C 29 H 13 N 6 P 2 S 1      | 0.057         | 539.04031   | 1.78        | 1.21           |
| C 15 H 15 N 11 O 6 P 2 S 1 | 0.058         | 539.04082   | 2.72        | 1.94           |
| C 31 H 15 N 3 O 1 P 2 S 1  | 0.053         | 539.04165   | 4.27        | 3.73           |
| C 16 H 21 N 4 O 11 P 2 S 1 | 0.066         | 539.04082   | 2.73        | 2.28           |
| C 15 H 25 O 15 P 2 S 1     | 0.076         | 539.03949   | 0.25        | -0.11          |

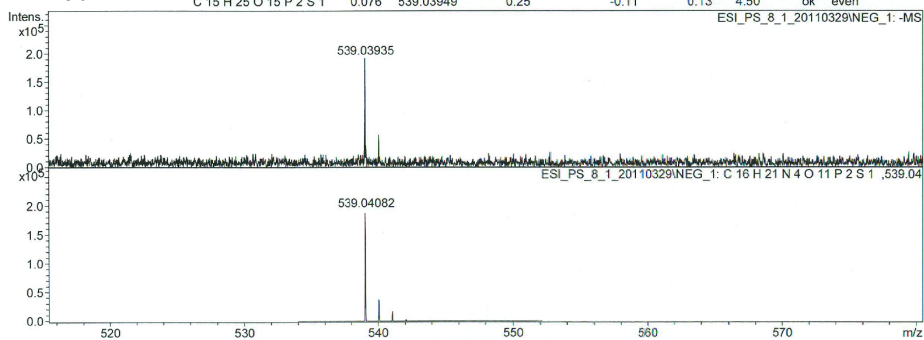

10. <sup>1</sup>H NMR, <sup>31</sup>P NMR and HRMS of 9b-2

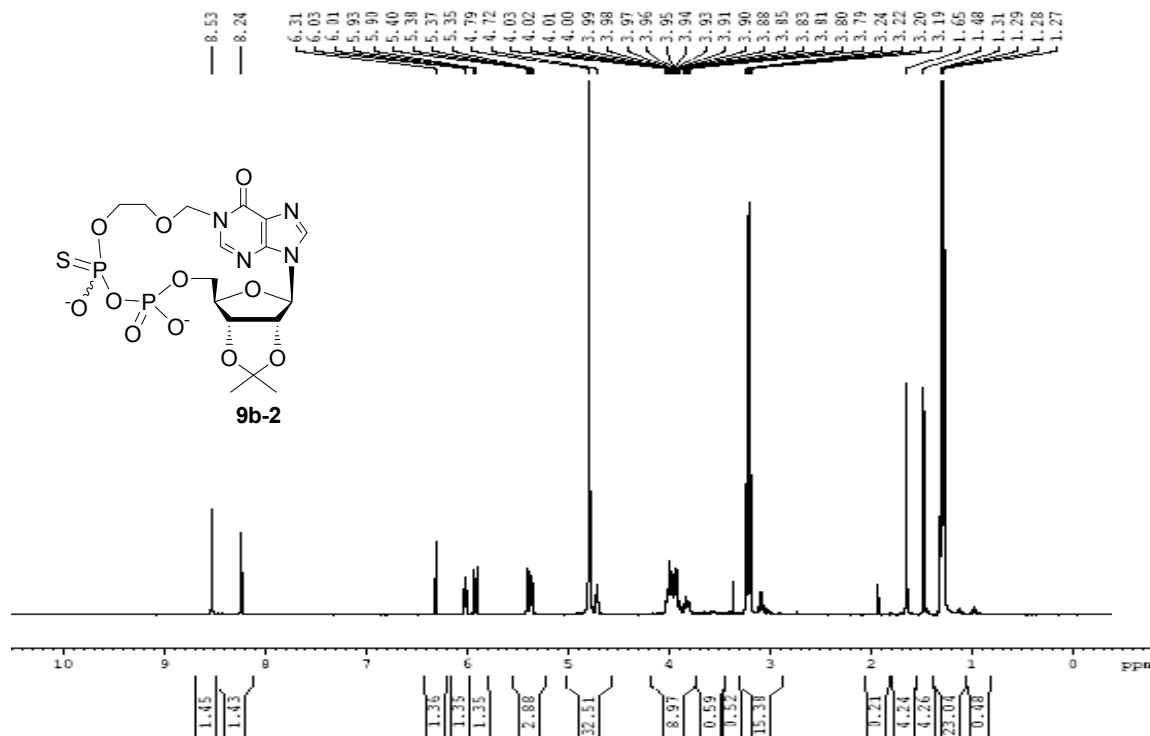

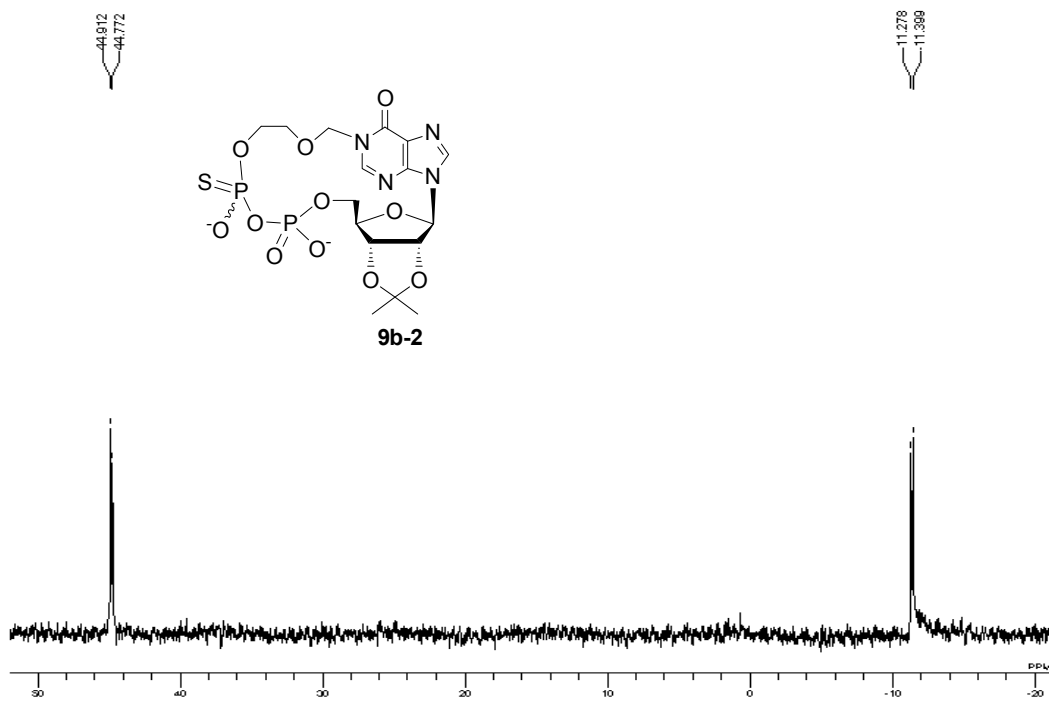

BJMU - BRUKER APEX IV FT-MS (7.0T) Spectrum Report

**Analysis Info** Acquisition Date 29/03/2011 10:17:24  
**Analysis Name** C:\data\_sample\ESI\_20110320\_30\ESI\_PS\_8\_2\_20110329\NE G\_1 Operator bpfxsh@bjmu.edu.cn  
 Instrument FT\_MS\_Bruker APEX IV (7.0 T)

**Comment** ESI C16H22N4O11P2S1 MW 540.0481  
 CALSAME; NEG 216.98461; 615.12089; 833.11525  
 POS 399.14451; 617.13639; 835.12827; 1053.12015; 1271.11203; 1489.10391; 1707.09579320.01451;  
 335.99207; 414.00562; 509.25407; 826.47121351; 96445  
 in 1:1 H2O:MeOH; CapExit 150V; m/z 150-3000; 1024K;  
 D1= 2s ; ns=8 100uL/h

**Acquisition Result:** Exact Mass Measured Mass Error (mDa) Error (ppm) Description

| Sum Formula                | Sigma | m/z       | Err [ppm] | Mean Err [ppm] | Err [mDa] | rdb   | N Rule | e <sup>-</sup> |
|----------------------------|-------|-----------|-----------|----------------|-----------|-------|--------|----------------|
| C 16 H 11 N 15 O 2 P 2 S 1 | 0.046 | 539.04216 | 4.38      | 2.82           | 2.36      | 20.00 | ok     | odd            |
| C 26 H 15 N 5 O 3 P 2 S 1  | 0.051 | 539.03763 | -4.02     | -5.17          | -2.17     | 23.00 | ok     | odd            |
| C 17 H 17 N 8 O 7 P 2 S 1  | 0.052 | 539.04216 | 4.39      | 3.12           | 2.37      | 14.50 | ok     | even           |
| C 15 H 15 N 11 O 6 P 2 S 1 | 0.054 | 539.04082 | 1.90      | 0.42           | 1.02      | 15.00 | ok     | odd            |
| C 28 H 17 N 2 O 4 P 2 S 1  | 0.056 | 539.03897 | -1.53     | -2.60          | -0.82     | 22.50 | ok     | even           |
| C 18 H 23 N 1 O 12 P 2 S 1 | 0.069 | 539.04217 | 4.40      | 3.46           | 2.37      | 9.00  | ok     | odd            |
| C 29 H 13 N 6 P 2 S 1      | 0.060 | 539.04031 | 0.95      | -0.28          | 0.51      | 27.50 | ok     | even           |
| C 16 H 21 N 4 O 11 P 2 S 1 | 0.061 | 539.04082 | 1.91      | 0.75           | 1.03      | 9.50  | ok     | even           |
| C 31 H 15 N 3 O 1 P 2 S 1  | 0.066 | 539.04165 | 3.45      | 2.23           | 1.86      | 27.00 | ok     | odd            |
| C 15 H 25 O 15 P 2 S 1     | 0.071 | 539.03949 | -0.57     | -1.64          | -0.31     | 4.50  | ok     | even           |

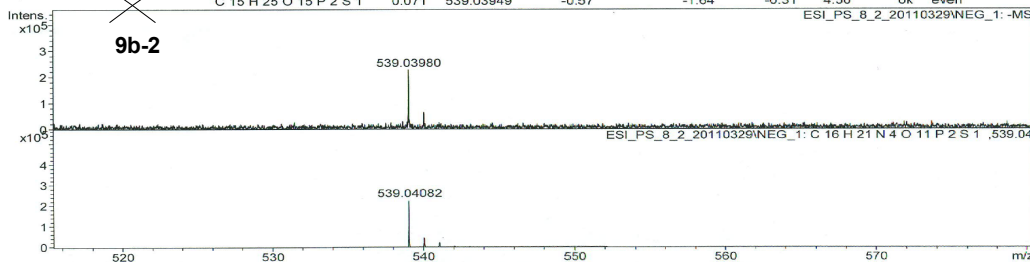

## 11. HPLC, <sup>1</sup>H NMR, <sup>31</sup>P NMR and HRMS of P<sub>S</sub><sup>2</sup>-cIDPRE-1

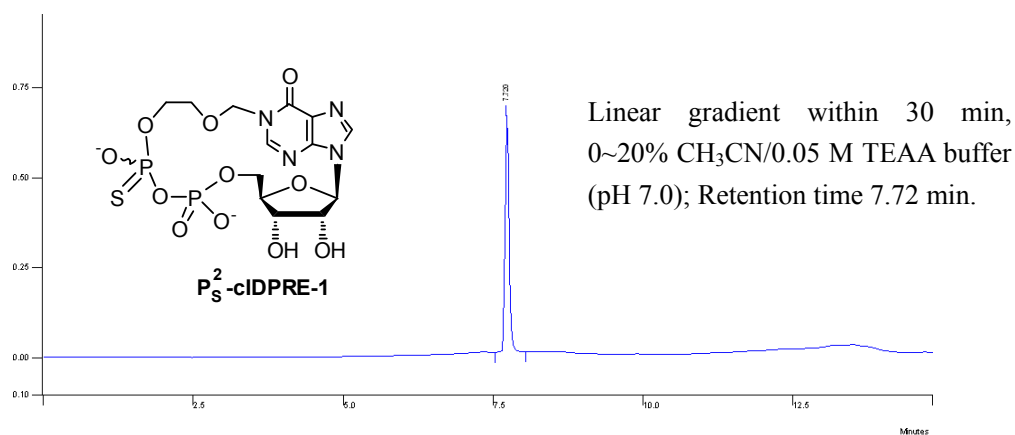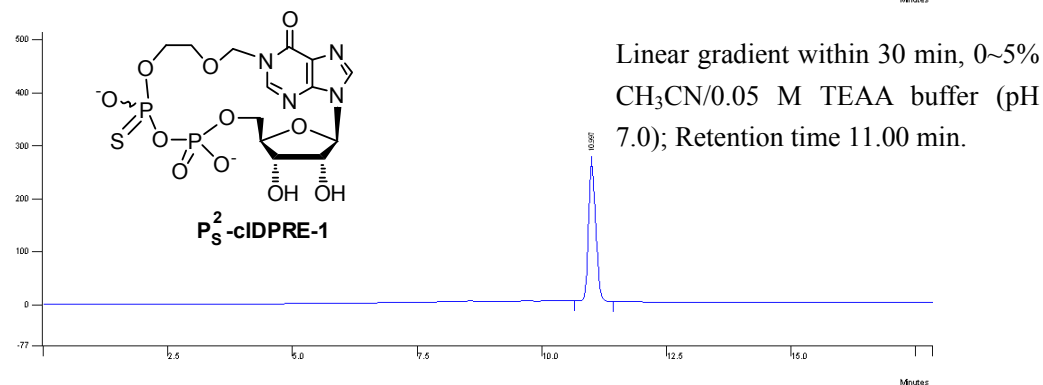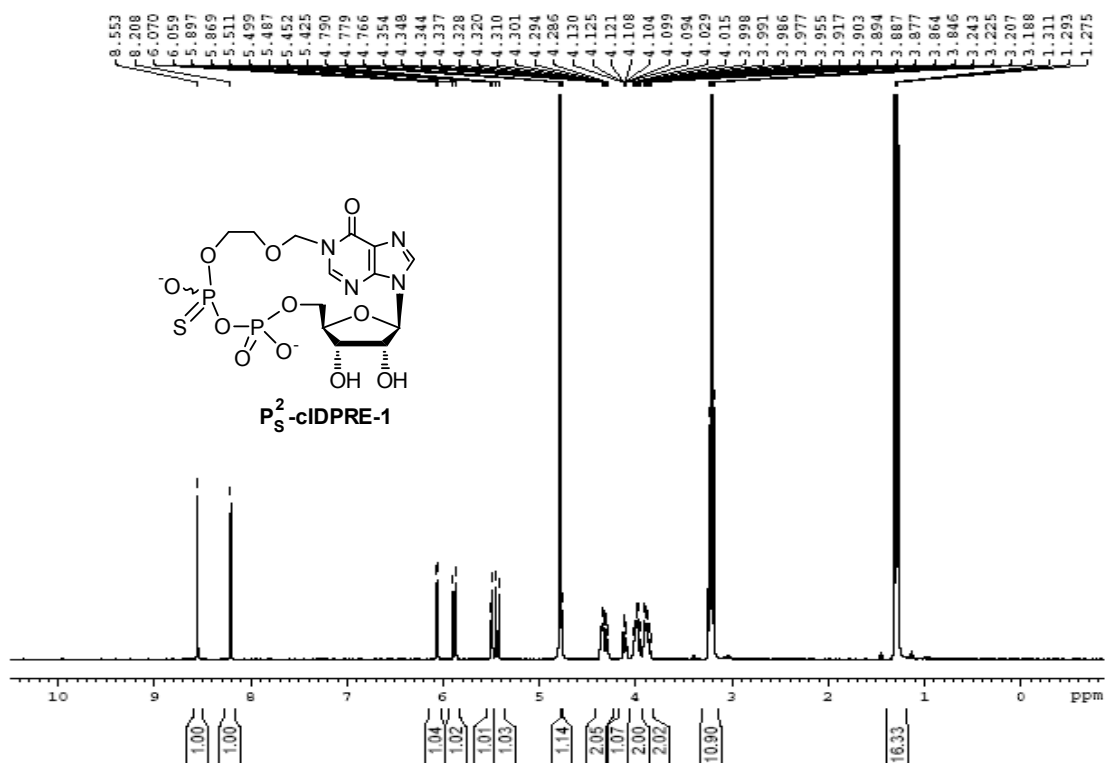

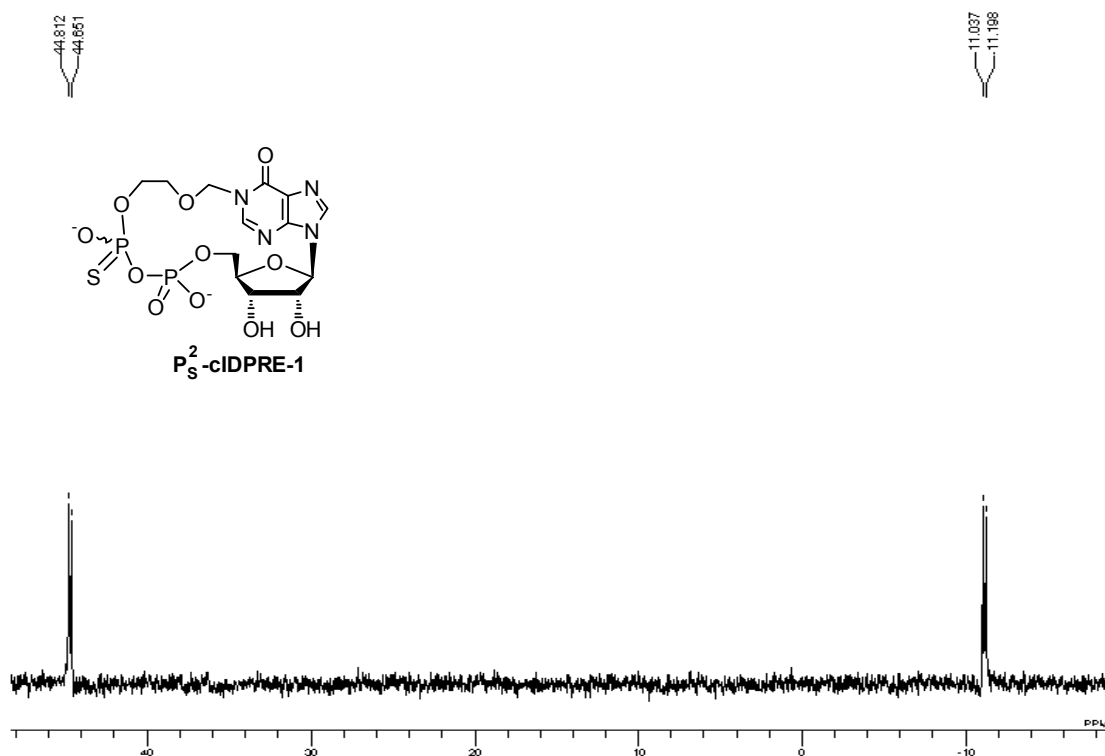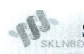

STATE KEY LABORATORY OF NATURAL AND BIOMIMETIC DRUGS ( PEKING UNIVERSITY )

Analysis Name C:\data\_sample\ESI\_20110401\_10\ESI\_PS\_9\_1\_20110406\NEG\_ Acquisition Date 06/04/2011 14:32:36  
 Method 2 Operator bpfxsh@bjmu.edu.cn; Tel: 010\_82801437  
 Sample Name Instrument FT\_MS\_Bruker APEX IV (7.0 T)  
 Comment ESI C13H18N4O11P2S1 MW 500.0168  
 CALSAME: NEG 216.98461; 615.12089; 833.11525  
 POS 399.14451; 617.13639; 835.12827; 1053.12015; 1271.11203; 1489.10391; 1707.09579320.01451;  
 335.99207; 414.00562; 509.25407; 826.47121351; 96445  
 in 1:1 H<sub>2</sub>O:MeOH; CapExit 150V; m/z 150-3000; 1024K;  
 D1= 2s; ns=8 100uL/h

| Acquisition Result: | Exact Mass | Measured Mass | Error (mm/e) | Error (ppm) | Description         |
|---------------------|------------|---------------|--------------|-------------|---------------------|
|                     | 499.00953  | 499.00894     | 0.59         | 1.18        | M-H; <sup>+</sup> e |

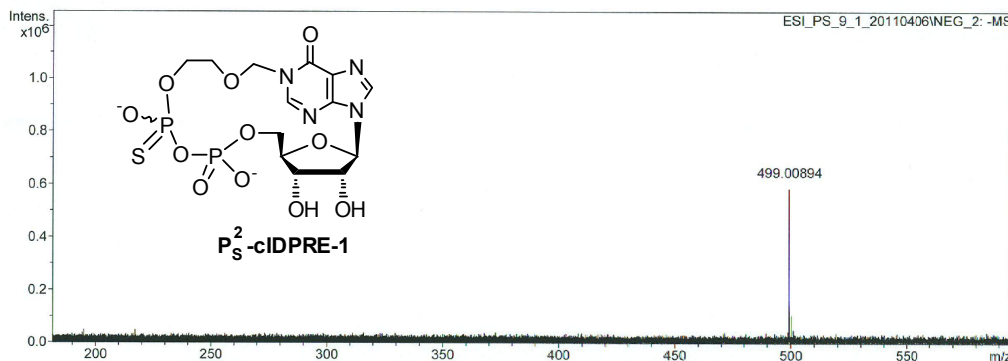

## 12. HPLC, <sup>1</sup>H NMR, <sup>31</sup>P NMR and HRMS of P<sub>S</sub><sup>2</sup>-cIDPRE-2

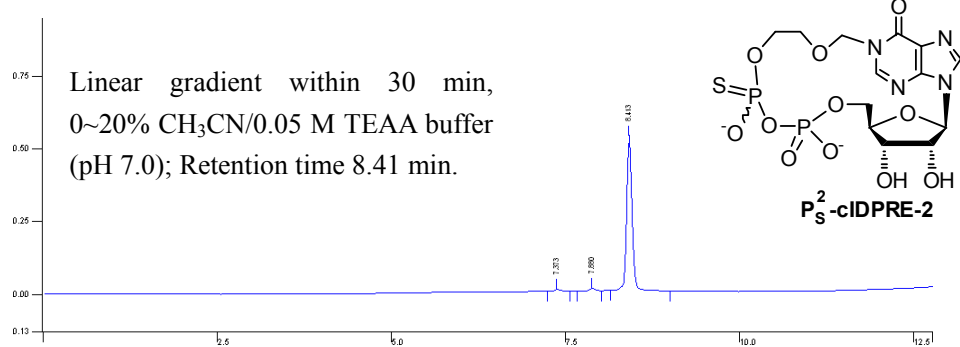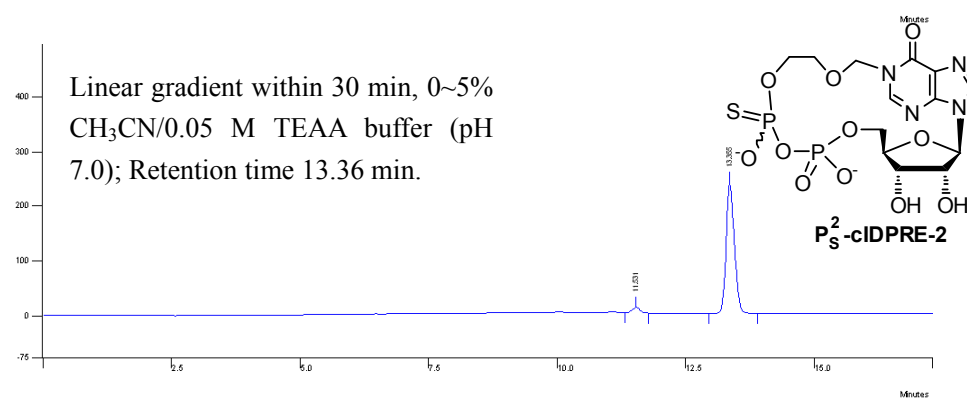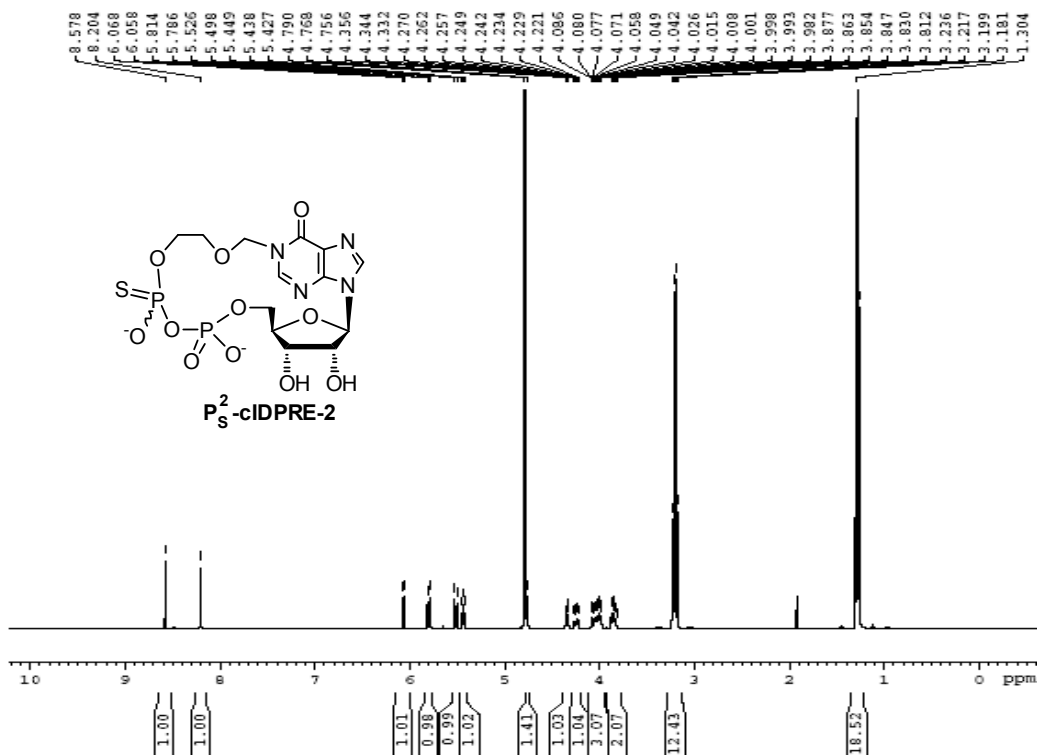

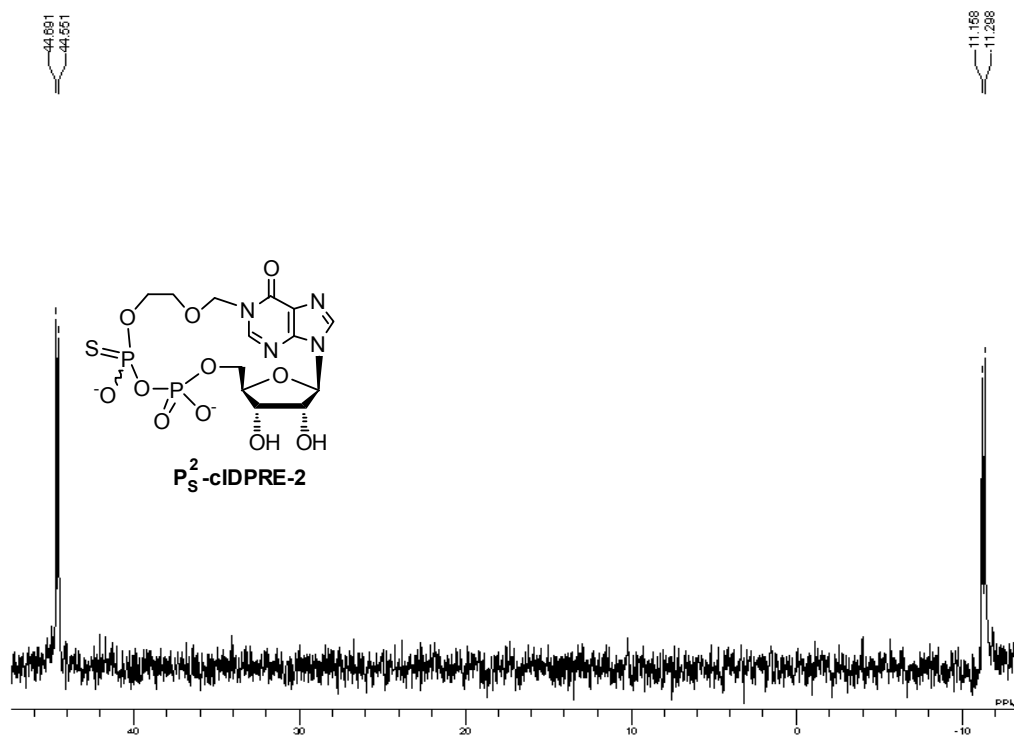

Bruker APEX IV FT\_MS (7.0 T) Report (all)

|                                                                                                                                                                                                                                                                                                                                                                                                                                                                                                                                                                                                                                                                                                                             |                                             |
|-----------------------------------------------------------------------------------------------------------------------------------------------------------------------------------------------------------------------------------------------------------------------------------------------------------------------------------------------------------------------------------------------------------------------------------------------------------------------------------------------------------------------------------------------------------------------------------------------------------------------------------------------------------------------------------------------------------------------------|---------------------------------------------|
| <p><b>Analysis Info</b></p> <p>Analysis Nam C:\data_sample\ESI_20110401_10\ESI_PS_9_2_20110406\NEG_1</p> <p>Method Operator bpfxsh@bjmu.edu.cn; Tel: 010_82801437</p> <p>Sample Name Instrument FT_MS_Bruker APEX IV (7.0 T)</p> <p>Comment ESI C<sub>13</sub>H<sub>18</sub>N<sub>4</sub>O<sub>11</sub>P<sub>2</sub>S<sub>1</sub> MW 500.0168<br/>             CALSAME; NEG 216.98461; 615.12089; 833.11525<br/>             POS 399.14451; 617.13639; 835.12827; 1053.12015; 1271.11203; 1489.10391; 1707.09579320.01451;<br/>             335.99207; 414.00562; 509.25407; 826.47121351; 96445<br/>             in 1:1 H<sub>2</sub>O:MeOH; CapExit 150V; m/z 150-3000; 1024K;<br/>             D1= 2s ; ns=8 100uL/h</p> | <p>Acquisition Date 06/04/2011 14:38:47</p> |
|-----------------------------------------------------------------------------------------------------------------------------------------------------------------------------------------------------------------------------------------------------------------------------------------------------------------------------------------------------------------------------------------------------------------------------------------------------------------------------------------------------------------------------------------------------------------------------------------------------------------------------------------------------------------------------------------------------------------------------|---------------------------------------------|

| Acquisition Result: | Exact Mass | Measured Mass | Error (mm/e) | Error (ppm) | Description          |
|---------------------|------------|---------------|--------------|-------------|----------------------|
|                     | 499.00953  | 499.009       | 0.53         | 1.06        | M-H; <sup>+</sup> e  |
|                     | 999.02633  | 999.02744     | -1.11        | -1.11       | 2M-H; <sup>+</sup> e |

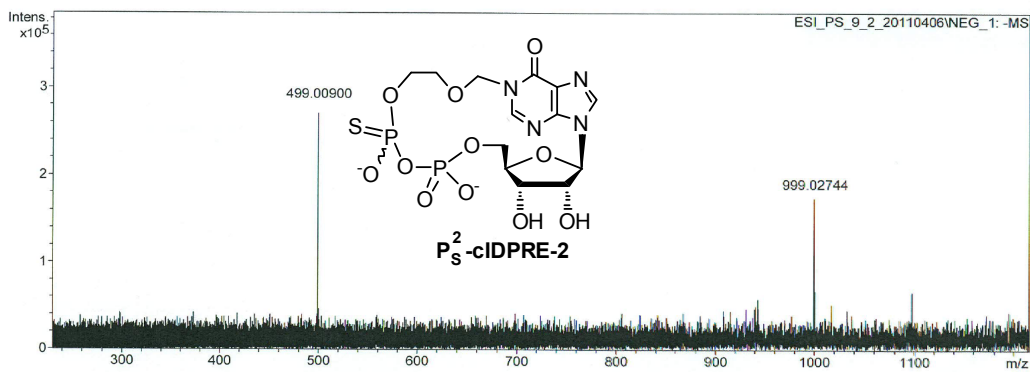

### 13. $^1\text{H}$ NMR, $^{31}\text{P}$ NMR and HRMS of 9c-1

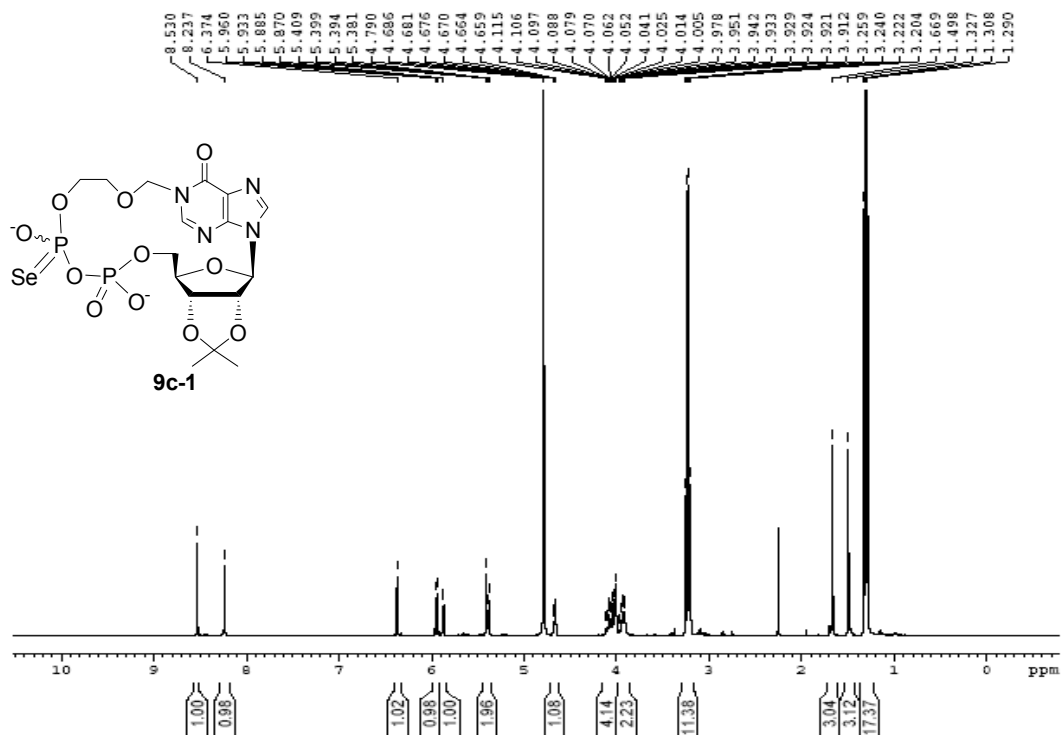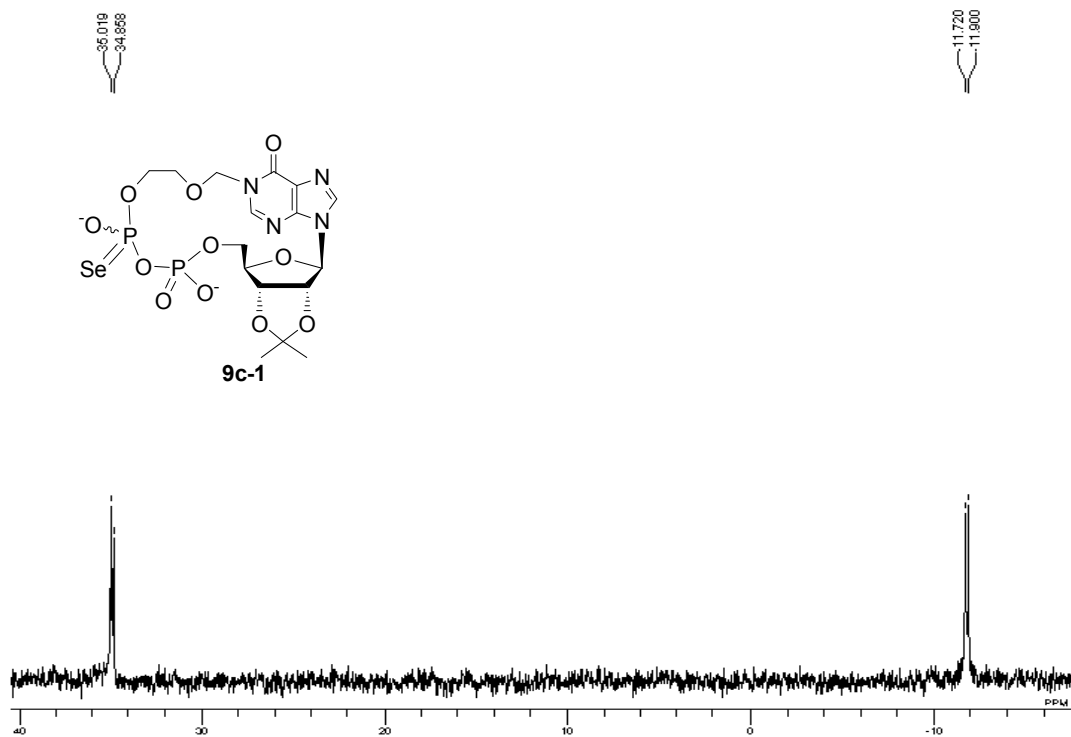

Bruker APEX IV FT\_MS (7.0 T) Report (all)

**Analysis Info** 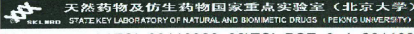 Acquisition Date 29/03/2011 09:57:23  
 Analysis Name C:\data\_sample\ESI\_20110320\_30\ESI\_PSE\_8\_1\_20110329\NEG\_5  
 Method Operator bpfxsh@bjmu.edu.cn; Tel: 010\_82801437  
 Sample Name Instrument FT\_MS\_Bruker APEX IV (7.0 T)  
 Comment ESI C<sub>16</sub>H<sub>22</sub>N<sub>4</sub>O<sub>11</sub>P<sub>2</sub>Se MW 587.99201  
 CALSAME; NEG 216.98461; 615.12089; 833.11525  
 POS 399.14451; 617.13639; 835.12827; 1053.12015; 1271.11203; 1489.10391; 1707.09579320.01451;  
 335.99207; 414.00562; 509.25407; 826.47121351; 96445  
 in 1:1 H<sub>2</sub>O:MeOH; CapExit 150V; m/z 150-3000; 1024K;  
 D1= 2s; ns=8 100uL/h

| Acquisition Result: | Exact Mass | Measured Mass | Error (mm/e) | Error (ppm) | Description |
|---------------------|------------|---------------|--------------|-------------|-------------|
|                     | 586.98473  | 586.98514     | -0.41        | -0.70       | M-H;+e      |

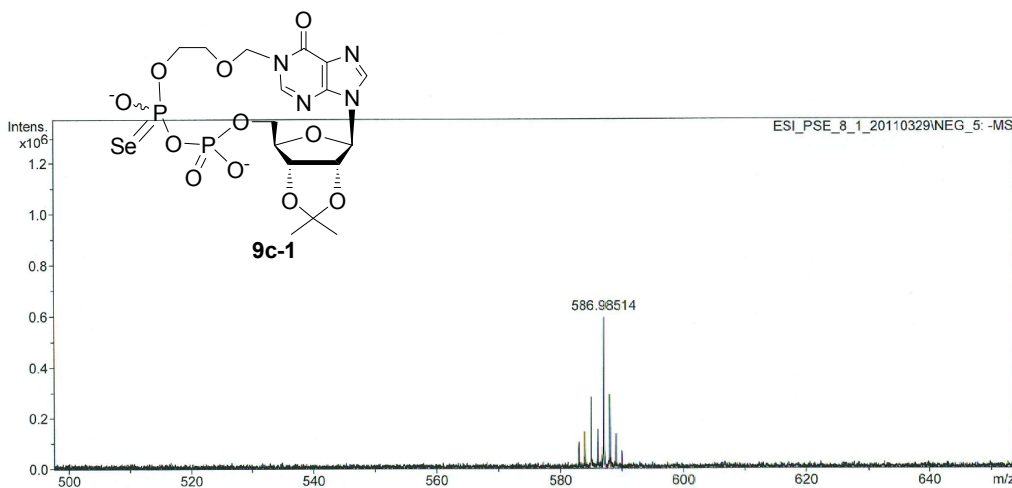

14. <sup>1</sup>H NMR, <sup>31</sup>P NMR and HRMS of 9c-2

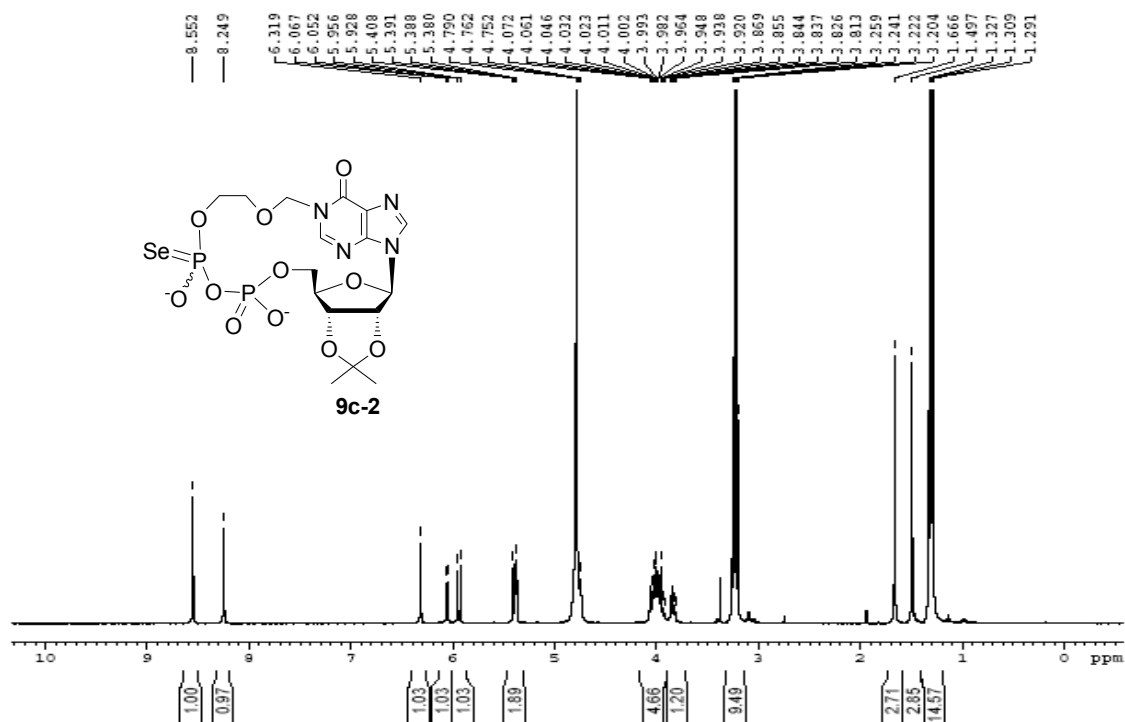



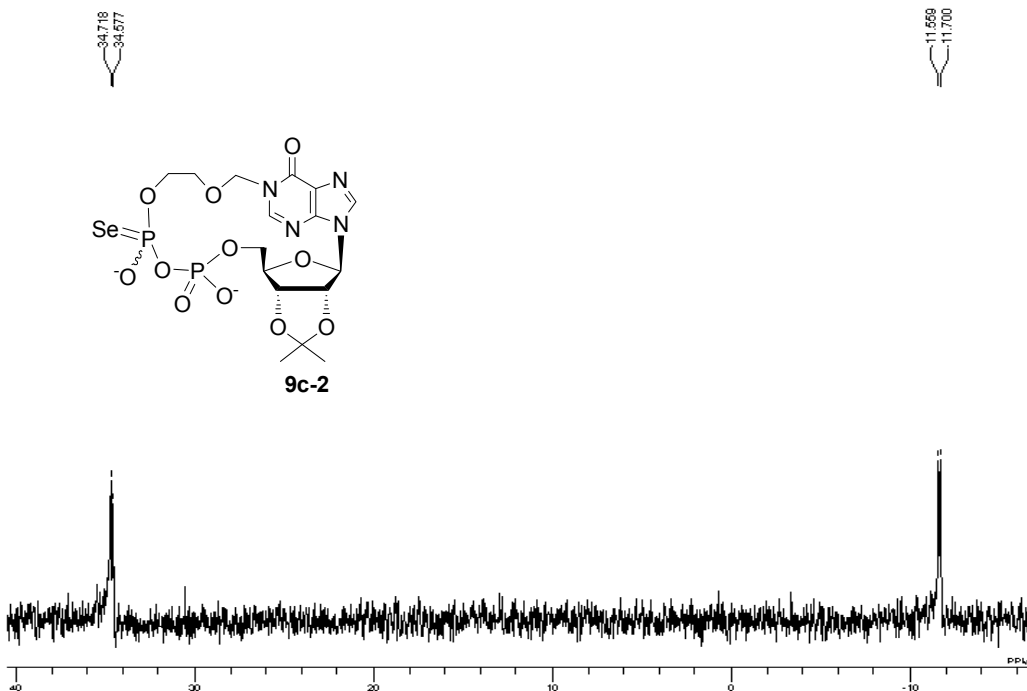

### Bruker APEX IV FT\_MS (7.0 T) Report (all)

**Analysis Info** 天然药物及仿生药物国家重点实验室 (北京大学)  
 STATE KEY LABORATORY OF NATURAL AND BIOMIMETIC DRUGS, PEKING UNIVERSITY

Acquisition Date: 29/03/2011 10:07:31

Analysis Name: C:\data\_sample\ESI\_20110320\_30\ESI\_PSE\_8\_2\_20110329\NEG\_1

Method: Operator: bpfxsh@bjmu.edu.cn; Tel: 010\_82801437

Sample Name: Instrument: FT\_MS\_Bruker APEX IV (7.0 T)

Comment: ESI C16H22N4O11P2SE MW 587.99201  
 CALSAME: NEG 216.98461; 615.12089; 833.11525  
 POS 399.14451; 617.13639; 835.12827; 1053.12015; 1271.11203; 1489.10391; 1707.09579320.01451;  
 335.99207; 414.00562; 509.25407; 826.47121351; 96445  
 in 1:1 H<sub>2</sub>O:MeOH; CapExit 150V; m/z 150-3000; 1024K;  
 D1= 2s; ns=8 100uL/h

| Acquisition Result: | Exact Mass | Measured Mass | Error (mm/e) | Error (ppm) | Description         |
|---------------------|------------|---------------|--------------|-------------|---------------------|
|                     | 586.98473  | 586.98456     | 0.17         | 0.29        | M-H; <sup>+</sup> e |

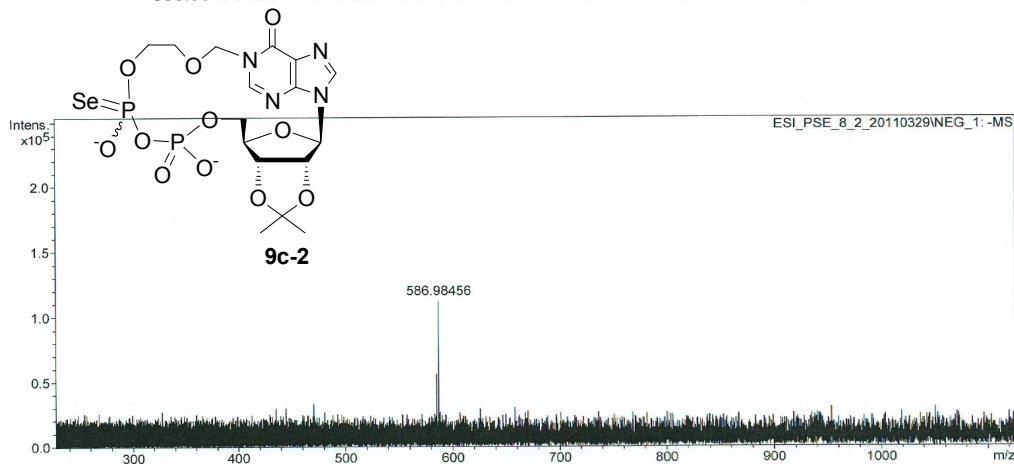

### 15. HPLC, <sup>1</sup>H NMR, <sup>31</sup>P NMR and HRMS of P<sub>Se</sub><sup>2</sup>-cIDPRE-1

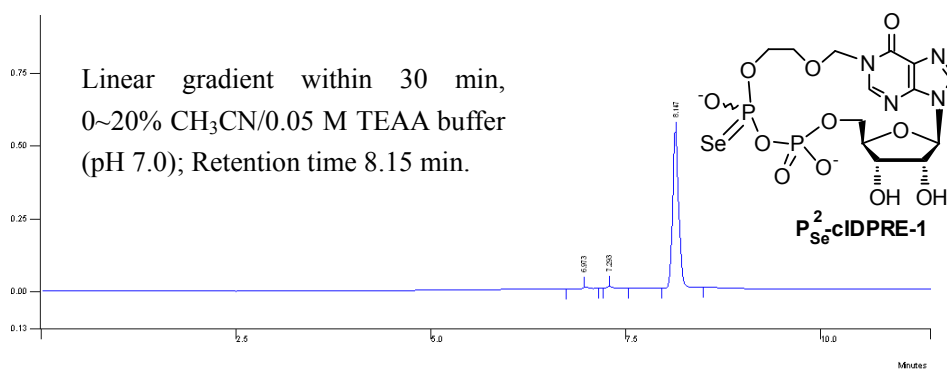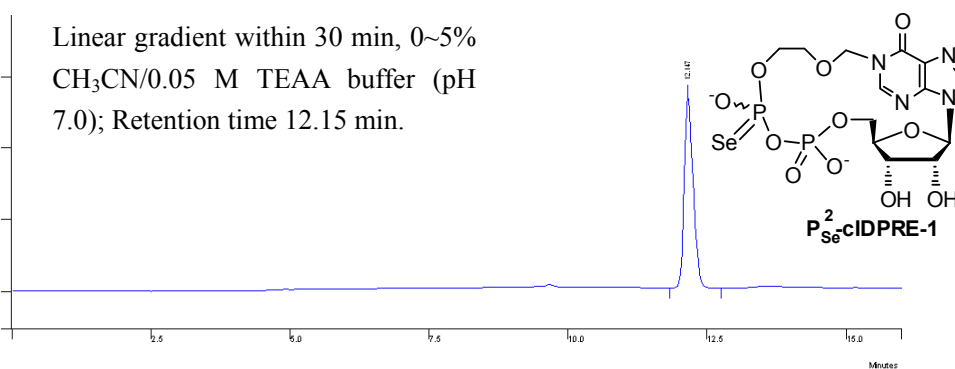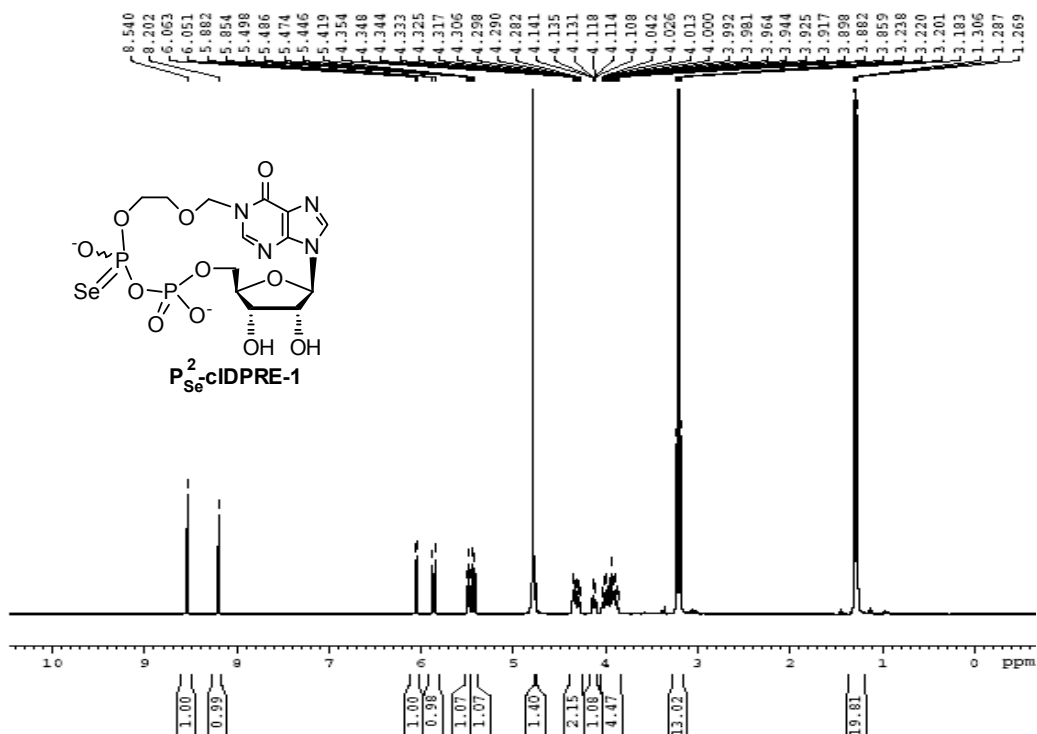

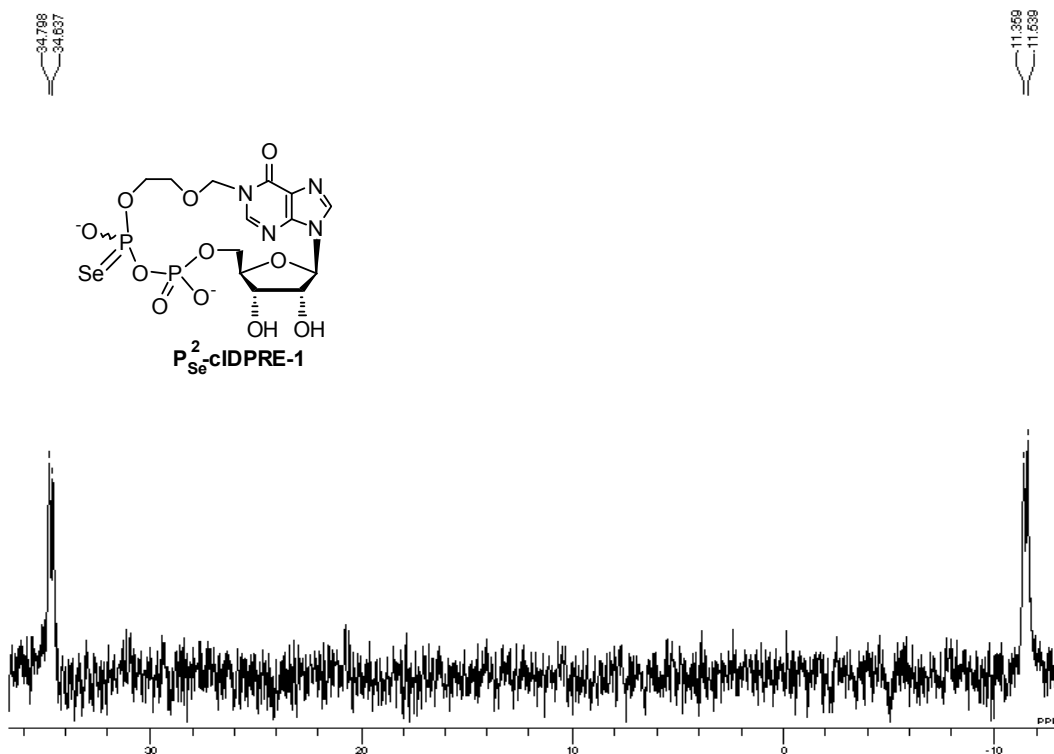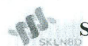

STATE KEY LABORATORY OF NATURAL AND BIOMIMETIC DRUGS (PEKING UNIVERSITY)

Analysis Nam C:\data\_sample\ESI\_20110401\_10\ESI\_PSE\_9\_1\_20110406\NEG Acquisition Date 06/04/2011 14:46:08  
 Method \_2 Operator bpxsh@bjmu.edu.cn; Tel: 010\_82801437  
 Sample Name Instrument FT\_MS\_Bruker APEX IV (7.0 T)  
 Comment ESI C<sub>13</sub>H<sub>18</sub>N<sub>4</sub>O<sub>11</sub>P<sub>2</sub>Se<sub>1</sub> MW 547.96071  
 CALSAME; NEG 216.98461; 615.12089; 833.11525  
 POS 399.14451; 617.13639; 835.12827; 1053.12015; 1271.11203; 1489.10391; 1707.09579320.01451;  
 335.99207; 414.00562; 509.25407; 826.47121351.96445  
 in 1:1 H<sub>2</sub>O:MeOH; CapExit 150V; m/z 150-3000; 1024K;  
 D1= 2s ; ns=8 100uL/h

| Acquisition Result: | Exact Mass | Measured Mass | Error ( mm/e) | Error (ppm) | Description         |
|---------------------|------------|---------------|---------------|-------------|---------------------|
|                     | 546.95343  | 546.95402     | -0.59         | -1.08       | M-H; <sup>+</sup> e |

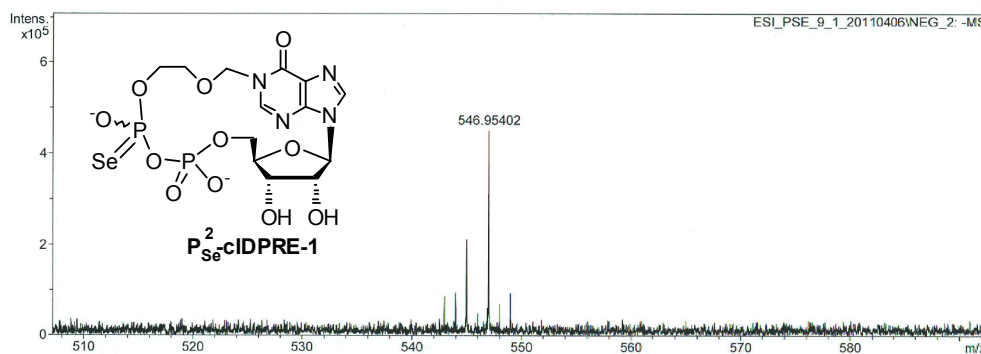

## 16. HPLC, <sup>1</sup>H NMR, <sup>31</sup>P NMR and HRMS of P<sub>Se</sub><sup>2</sup>-cIDPRE-2

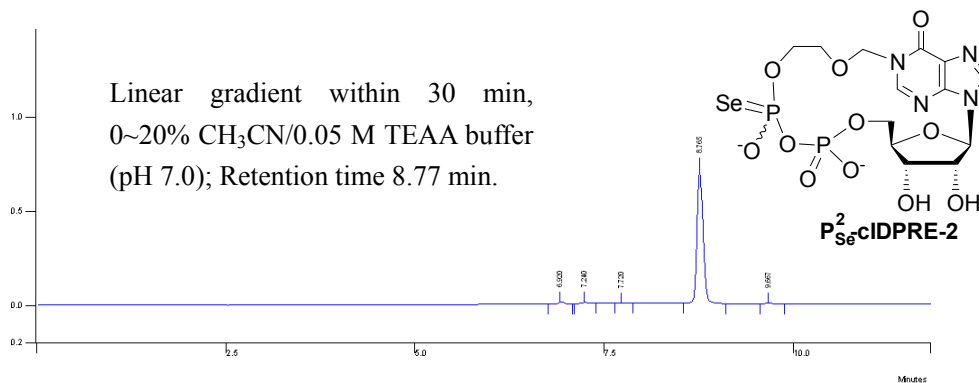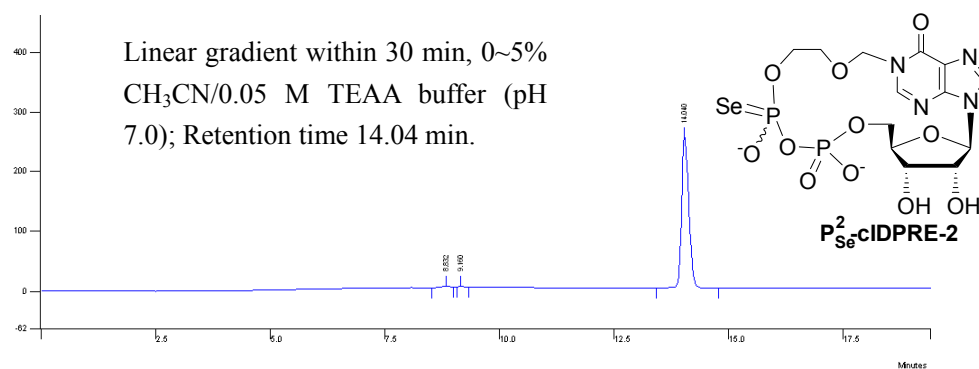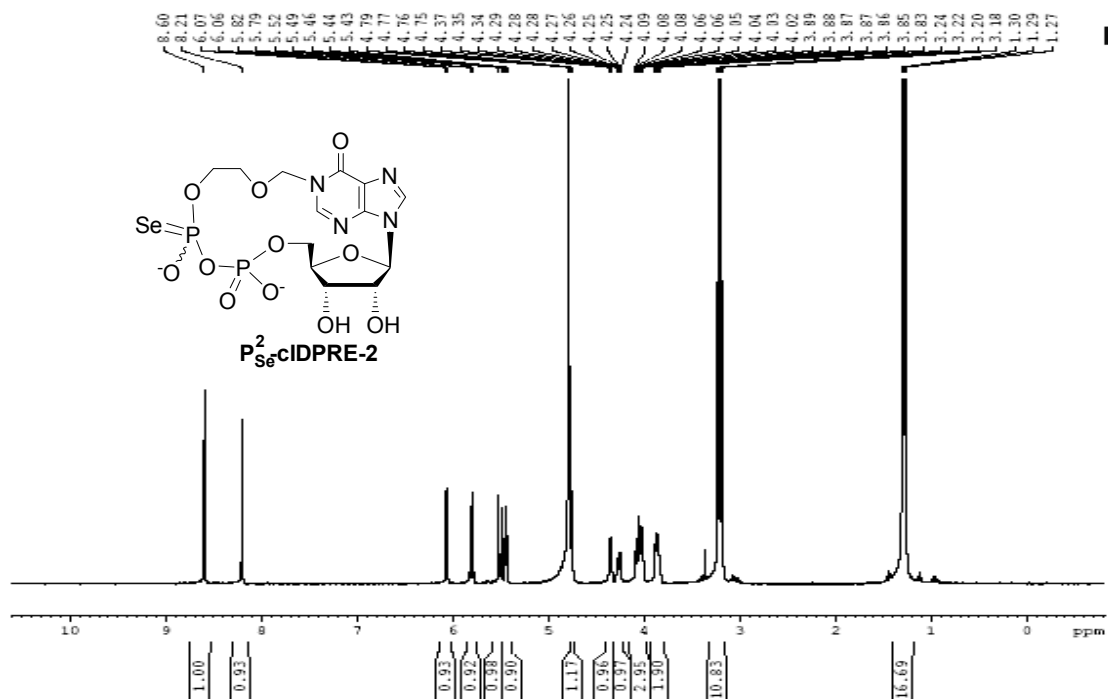

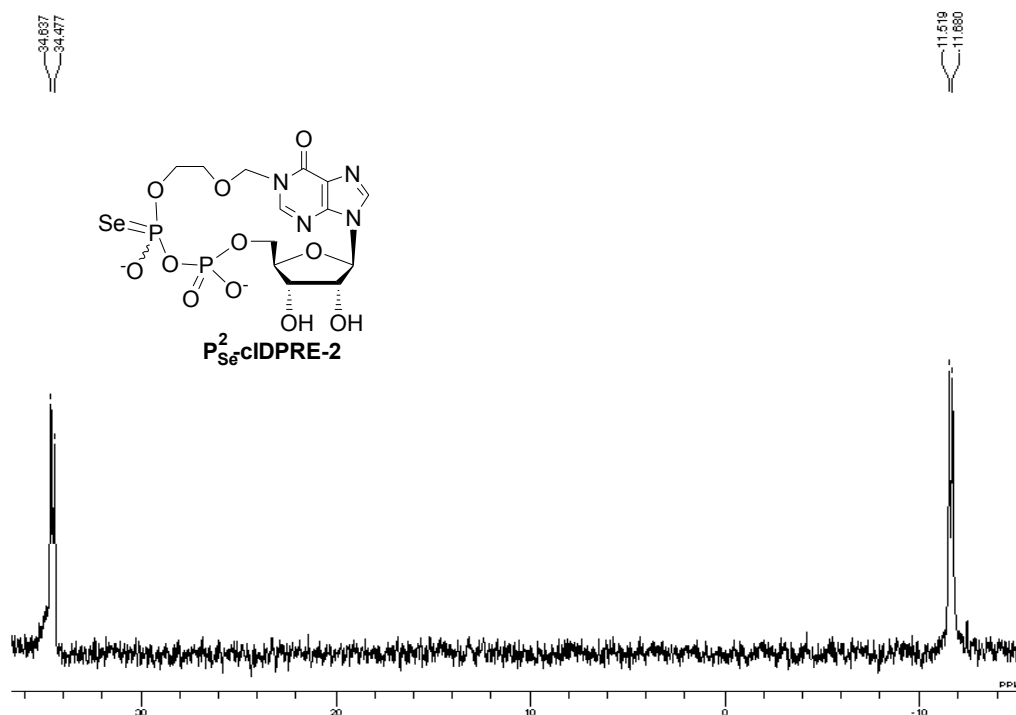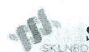

STATE KEY LABORATORY OF NATURAL AND BIOMIMETIC DRUGS (PEKING UNIVERSITY)

Analysis Name C:\data\_sample\ESI\_20110401\_10\ESI\_PSE\_9\_2\_20110406\NEG Acquisition Date 06/04/2011 14:54:35  
 Method \_2 Operator bpfxsh@bjmu.edu.cn; Tel: 010\_82801437  
 Sample Name Instrument FT\_MS\_Bruker APEX IV (7.0 T)  
 Comment ESI C13H18N4O11P2SE1 MW 547.96071  
 CALSAME; NEG 216.98461; 615.12089; 833.11525  
 POS 399.14451; 617.13639; 835.12827; 1053.12015; 1271.11203; 1489.10391; 1707.09579320.01451;  
 335.99207; 414.00562; 509.25407; 826.47121351; 96445  
 in 1:1 H<sub>2</sub>O:MeOH; CapExit 150V; m/z 150-3000; 1024K;  
 D1= 2s ; ns=8 100uL/h

| Acquisition Result: | Exact Mass | Measured Mass | Error (mm/e) | Error (ppm) | Description         |
|---------------------|------------|---------------|--------------|-------------|---------------------|
|                     | 546.95343  | 546.95362     | -0.19        | -0.35       | M-H; <sup>+</sup> e |

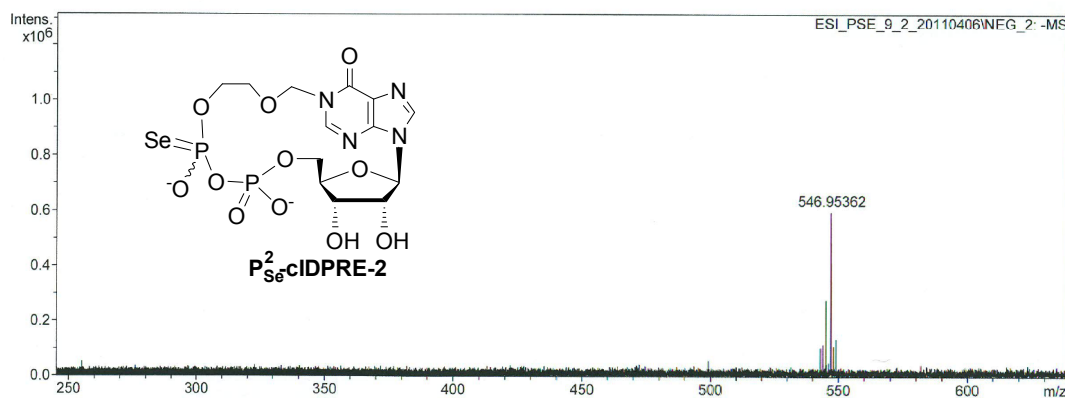

## 17. Bioassay results of P<sub>S</sub><sup>1</sup>-cIDPRE-1 and P<sub>S</sub><sup>1</sup>-cIDPRE-2

The bioassay was carried out with similar procedures of reference **6e** and **6f** (Reference **6e**. M. Dong, T. Kirchberger, X. C. Huang, Z. J. Yang, L. R. Zhang, A. H. Guse and L. H. Zhang, *Org. Biomol. Chem.*, 2010, **8**, 4705-4715; **6f**. L. J. Li, C. C. Siebrands, Z. J. Yang, L. R. Zhang, A. H. Guse and L. H. Zhang, *Org. Biomol. Chem.*, 2010, **8**, 1843-1848).

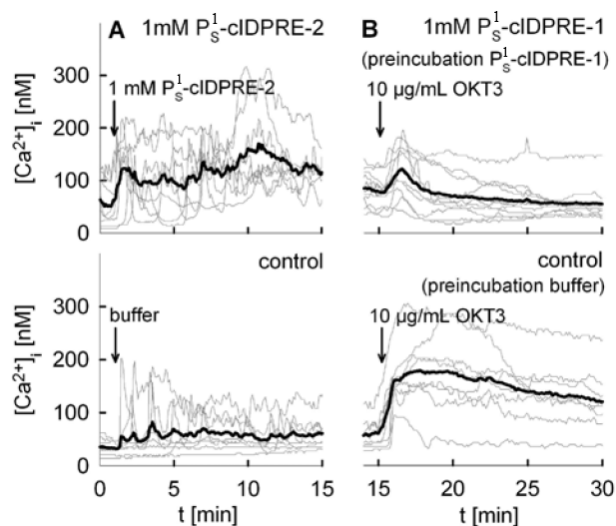

**Fig. S-1** Effects of P<sub>S</sub><sup>1</sup>-cIDPRE-1 and P<sub>S</sub><sup>1</sup>-cIDPRE-2 on the free cytosolic Ca<sup>2+</sup> concentration. Jurkat T-cells loaded with the fluorescent Ca<sup>2+</sup> dye Fura2-AM were analyzed over 14 minutes after addition of compounds or vehicle. (A) Stimulation with 1 mM compound P<sub>S</sub><sup>1</sup>-cIDPRE-2 (n = 8) evoked Ca<sup>2+</sup> release in contrast to buffer control (n = 8); (B) Application of OKT3 (10 μg/mL) in the presence of 1 mM cIDPRE-analogue P<sub>S</sub><sup>1</sup>-cIDPRE-1 (n = 11) (14 minutes preincubation) resulted in significantly lower Ca<sup>2+</sup> signaling as compared to OKT3 alone (n = 8). Gray line: time courses of single cells; black line: mean of 8-11 cells. The arrow indicates time of compound or vehicle application.

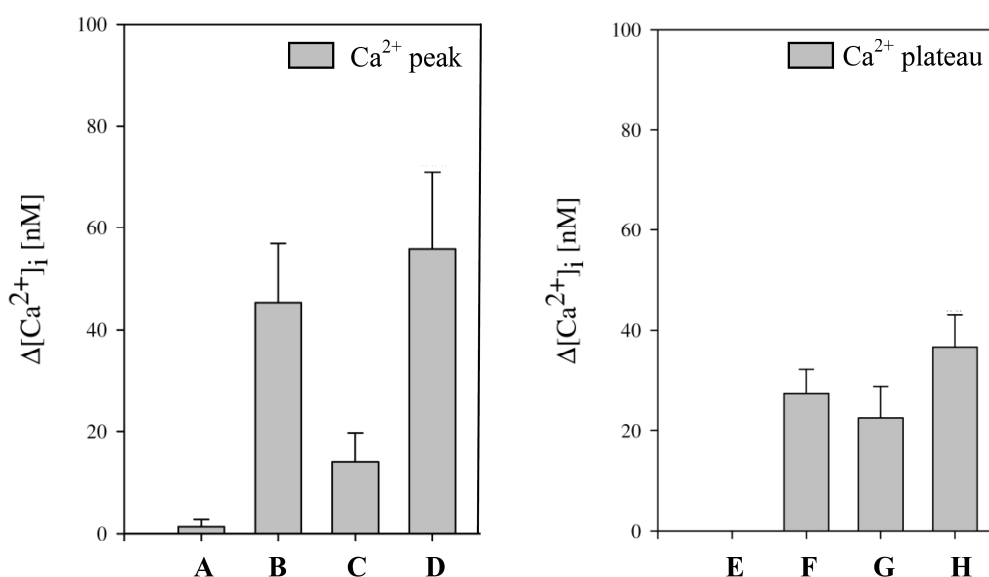

**Fig. S-2** Comparison of effects of cIDPRE, P<sub>s</sub><sup>1</sup>-cIDPRE-1 and P<sub>s</sub><sup>1</sup>-cIDPRE-2 on Ca<sup>2+</sup> release. Jurkat T-cells loaded with the fluorescent Ca<sup>2+</sup> dye Fura2-AM were analyzed over 14 minutes after addition of compounds or vehicle. Ca<sup>2+</sup> peak: difference between the Ca<sup>2+</sup> concentration 0.4 minutes after compound application and the basal Ca<sup>2+</sup> concentration (after one minute); Ca<sup>2+</sup> plateau: difference between the Ca<sup>2+</sup> concentration ten minutes after compound application and the basal Ca<sup>2+</sup> concentration (after one minute). (A) Ca<sup>2+</sup> peak stimulated by buffer control (n = 57); (B) Ca<sup>2+</sup> peak stimulated by 1 mM cIDPRE (n = 58); (C) Ca<sup>2+</sup> peak stimulated by 1 mM P<sub>s</sub><sup>1</sup>-cIDPRE-1 (n = 39); (D) Ca<sup>2+</sup> peak stimulated by 1 mM P<sub>s</sub><sup>1</sup>-cIDPRE-2 (n = 33); (E) Ca<sup>2+</sup> plateau stimulated by buffer control (n = 57); (F) Ca<sup>2+</sup> plateau stimulated by 1 mM cIDPRE (n = 58); (G) Ca<sup>2+</sup> plateau stimulated by 1 mM P<sub>s</sub><sup>1</sup>-cIDPRE-1 (n = 39); (H) Ca<sup>2+</sup> plateau stimulated by 1 mM P<sub>s</sub><sup>1</sup>-cIDPRE-2 (n = 33).

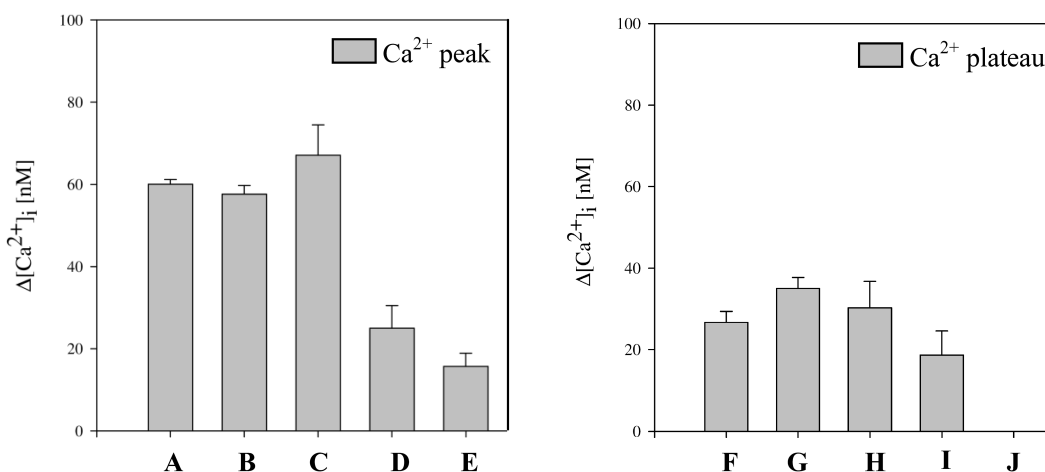

**Fig. S-3** Antagonistic effects of P<sub>s</sub><sup>1</sup>-cIDPRE-1 on Ca<sup>2+</sup> release. Jurkat T-cells loaded with the fluorescent Ca<sup>2+</sup> dye Fura2-AM were analyzed over 14 minutes after addition of compounds or vehicle. Ca<sup>2+</sup> Peak: difference between the Ca<sup>2+</sup> concentration 2.5 minutes after OKT3 application and the basal Ca<sup>2+</sup> concentration (after 15 minutes); Ca<sup>2+</sup> Plateau: difference between the Ca<sup>2+</sup> concentration ten minutes after OKT3 application and the basal Ca<sup>2+</sup> concentration (after 15 minutes). (A) Ca<sup>2+</sup> peak stimulated by 1 mM cIDPRE (n = 58); (B) Ca<sup>2+</sup> peak stimulated by OKT3 (10 μg/mL) in the presence of buffer (14 minutes

preincubation) (n = 41); (C) (D) (E) Ca<sup>2+</sup> peak stimulated by OKT3 (10 µg/mL) in the presence of 100 µM (n = 35), 500 µM (n = 31) or 1 mM (n = 39) P<sub>S</sub><sup>1</sup>-cIDPRE-1 (14 minutes preincubation); (F) Ca<sup>2+</sup> plateau stimulated by 1 mM cIDPRE (n = 58); (G) Ca<sup>2+</sup> plateau stimulated by OKT3 (10 µg/mL) in the presence of buffer (14 minutes preincubation) (n = 41); (H) (I) (J) Ca<sup>2+</sup> plateau stimulated by OKT3 (10 µg/mL) in the presence of 100 µM (n = 35), 500 µM (n = 31) or 1 mM (n = 39) P<sub>S</sub><sup>1</sup>-cIDPRE-1 (14 minutes preincubation).

### **18. Procedures for preparation of P<sub>S</sub><sup>1</sup>-cIDPRE-1, P<sub>S</sub><sup>1</sup>-cIDPRE-2, P<sub>Se</sub><sup>1</sup>-cIDPRE-1, P<sub>Se</sub><sup>1</sup>-cIDPRE-2, P<sub>S</sub><sup>2</sup>-cIDPRE-1, P<sub>S</sub><sup>2</sup>-cIDPRE-2, P<sub>Se</sub><sup>2</sup>-cIDPRE-1 and P<sub>Se</sub><sup>2</sup>-cIDPRE-2**

All solvents were dried and distilled prior to use. Unless otherwise noted, materials were obtained from commercial suppliers and were used as provided. Evaporations were carried out under reduced pressure with a bath temperature of 35 °C. <sup>1</sup>H NMR data were recorded with Bruker Avance III 400 spectrometer; Chemical shifts were reported in parts per million downfield from TMS. <sup>31</sup>P NMR spectra were recorded at room temperature using Bruker Avance 300 (121.5 MHz) or JNM-ECA 600 (243.0 MHz) spectrometer; Orthophosphoric acid (85%) was used as an external standard. HR-ESI-MS (electrospray ionization) were attained with Bruker APEX IV. Optical rotation was determined with Perkin-Elmer 243B polarimeter. The analysis of compounds was performed on Welch XB analytical C<sub>18</sub> reversed-phase column (5 µm, 4.6 x 150 mm) with Varian HPLC by the buffer system: MeCN/TEAA (pH = 7.0). The purification of compounds was performed on Agela Venusil XBP preparative C<sub>18</sub> reversed-phase column (10 µm, 22 ×250 mm) with Gilson HPLC by the buffer system: MeCN/TEAA (pH = 7.0).

Methods for preparative HPLC:

Method A: performed with C<sub>18</sub> reversed-phase column, eluting with a linear gradient of 0-40% CH<sub>3</sub>CN in TEAA buffer solution (0.05 M, pH 7.0), 5 mL/min of flow rate, 260 nm of detection wavelength.

Method B: performed with C<sub>18</sub> reversed-phase column, eluting with a linear gradient of 0-15% CH<sub>3</sub>CN in TEAA buffer solution (0.05 M, pH 7.0), 5 mL/min of flow rate, 260 nm of detection wavelength.



***N*<sup>1</sup>-[(5''-*O*-phosphorylethoxy)methyl]-5'-*O*-phosphorothioate-2',3'-*O*-isopropylideneinosine-5',5''-cyclicpyrophosphate **5b-1** and **5b-2**.** 2-Cyanoethoxy-*N,N,N',N'*-tetra-isopropylphosphoramidite (41  $\mu$ L, 0.13 mmol) was added to a solution of **2** (50 mg, 89  $\mu$ mol) and 1*H*-tetrazole (19 mg, 0.27 mmol) in CH<sub>3</sub>CN (30 mL) under argon. After the reaction was continued for 0.5 h, CS<sub>2</sub> solution (30 mL) of S<sub>8</sub> (32 mg, 1 mmol) was added and the reaction was continued for 8 h. After the reaction mixture was evaporated, the residue resolved in H<sub>2</sub>O and extracted with CHCl<sub>3</sub>. The aqueous layer was concentrated. The purification was performed with method A for preparative HPLC to give compound **4b** (a pair of diastereoisomers, unseparated, 37.6 mg, 61%). Compound **4b** was resolved in 1M TEAB bicarbonate buffer (pH = 7.5, 5 mL) and the reaction was stirred for 3h at room temperature. After evaporation, the separation of the mixture was performed with method A for preparative HPLC. The fractions of **5b-1** (13.4 mg, 32%) and **5b-2** (23.0 mg, 58%) were collected separately. Data for **5b-1**:  $\delta_{\text{H}}$ (400MHz; D<sub>2</sub>O) 1.47, 1.63 (each s, each 3H, (CH<sub>3</sub>)<sub>2</sub>C), 3.86-3.95 (m, 6H, H<sub>5</sub>'', OCH<sub>2</sub>CH<sub>2</sub>OP), 4.62-4.63 (m, 1H, H<sub>4</sub>''), 5.35-5.39 (m, 2H, H<sub>1</sub>'',a, H<sub>3</sub>''), 5.92-5.95 (m, 2H, H<sub>1</sub>'',b, H<sub>2</sub>''), 6.35 (s, 1H, H<sub>1</sub>''), 8.21 (s, 1H, H<sub>8</sub>), 8.49 (s, 1H, H<sub>2</sub>);  $\delta_{\text{P}}$ (121.5 MHz; D<sub>2</sub>O; decoupled with <sup>1</sup>H) -10.84 (s), 43.94 (s); m/z (ESI-TOF<sup>-</sup>) 539.0402 (M<sup>-</sup> requires 539.0408). Data for **5b-2**:  $\delta_{\text{H}}$ (400MHz; D<sub>2</sub>O) 1.47, 1.63 (each s, each 3H, (CH<sub>3</sub>)<sub>2</sub>C), 3.75-3.76 (m, 1H, H<sub>5a</sub>''), 3.88-4.06 (m, 5H, H<sub>5b</sub>'', OCH<sub>2</sub>CH<sub>2</sub>OP), 4.70 (m, 1H, H<sub>4</sub>''), 5.30-5.31 (m, 1H, H<sub>3</sub>''), 5.38 (d, 1H, J<sub>H<sub>1</sub>'',a, H<sub>1</sub>'',b</sub> = 11.2 Hz, H<sub>1</sub>'',a), 5.90 (d, 1H, J<sub>H<sub>1</sub>'',b, H<sub>1</sub>'',a</sub> = 11.2 Hz, H<sub>1</sub>'',b), 5.94 (m, 1H, H<sub>2</sub>''), 6.30 (s, 1H, H<sub>1</sub>''), 8.23 (s, 1H, H<sub>8</sub>), 8.49 (s, 1H, H<sub>2</sub>);  $\delta_{\text{P}}$ (121.5 MHz; D<sub>2</sub>O; decoupled with <sup>1</sup>H) -10.63 (s), 43.56 (s); m/z (ESI-TOF<sup>-</sup>) 539.0427 (M<sup>-</sup> requires 539.0408).

***N*<sup>1</sup>-[(5''-*O*-phosphorylethoxy)methyl]-5'-*O*-phosphorothioate-inosine-5',5''-cyclic pyrophosphate **P<sub>S</sub><sup>1</sup>-cIDPRE-1** and **P<sub>S</sub><sup>1</sup>-cIDPRE-2**.** The solution of **5b-1** (13.4 mg, 18  $\mu$ mol) in 60% HCOOH (5 mL) was stirred for 12 h and then evaporated under reduced pressure. The purification of the residue was performed with method A for preparative HPLC, and the main fraction was collected to give the target molecule **P<sub>S</sub><sup>1</sup>-cIDPRE-1** (10.8 mg, 85%). The same treatment was imposed on **5b-2** to give **P<sub>S</sub><sup>1</sup>-cIDPRE-2** (18.5 mg, 85%), which was purified with the same procedure. Data for **P<sub>S</sub><sup>1</sup>-cIDPRE-1**:  $\delta_{\text{H}}$ (400MHz; D<sub>2</sub>O) 3.88-3.91 (m, 4H, OCH<sub>2</sub>CH<sub>2</sub>OP), 4.09-4.10 (m, 1H, H<sub>5a</sub>''), 4.18-4.21 (m, 1H, H<sub>5b</sub>''), 4.30 (m, 1H, H<sub>4</sub>''), 4.90-4.92 (m, 1H, H<sub>3</sub>''), 5.38-5.40 (m, 1H, H<sub>2</sub>''), 5.46 (d, 1H, J<sub>H<sub>1</sub>'',a, H<sub>1</sub>'',b</sub> = 11.2 Hz, H<sub>1</sub>'',a), 5.81 (d, 1H, J<sub>H<sub>1</sub>'',b, H<sub>1</sub>'',a</sub> = 11.2 Hz, H<sub>1</sub>'',b), 6.05 (d, 1H, J<sub>H<sub>1</sub>'', H<sub>2</sub>'</sub> = 3.2 Hz, H<sub>1</sub>''), 8.19 (s, 1H, H<sub>8</sub>), 8.49 (s, 1H,

H<sub>2</sub>);  $\delta_P$ (243.0 MHz; D<sub>2</sub>O; decoupled with <sup>1</sup>H) -10.67 (s), 43.15 (s); m/z (ESI-TOF<sup>-</sup>) 499.0089 (M<sup>-</sup> requires 499.0095). Data for **P<sup>1</sup><sub>S</sub>-cIDPRE-2**:  $\delta_H$ (400MHz; D<sub>2</sub>O) 3.82-3.85 (m, 2H, OCH<sub>2</sub>), 3.95-3.99 (m, 2H, CH<sub>2</sub>OP), 4.10-4.14 (m, 1H, H<sub>5a</sub>'), 4.22-4.27 (m, 1H, H<sub>5b</sub>'), 4.33 (m, 1H, H<sub>4</sub>'), 4.79 (buried in H<sub>2</sub>O residue peak, 1H, H<sub>3</sub>'), 5.39-5.41 (m, 1H, H<sub>2</sub>'), 5.51 (d, 1H,  $J_{H1''a, H1''b} = 11.2$  Hz, H<sub>1</sub>''a), 5.78 (d, 1H,  $J_{H1''b, H1''a} = 11.2$  Hz, H<sub>1</sub>''b), 6.06 (d, 1H,  $J_{H1', H2'} = 3.6$  Hz, H<sub>1</sub>'), 8.19 (s, 1H, H<sub>8</sub>), 8.51 (s, 1H, H<sub>2</sub>);  $\delta_P$ (243.0 MHz; D<sub>2</sub>O; decoupled with <sup>1</sup>H) -10.72 (s), 43.91 (s); m/z (ESI-TOF<sup>-</sup>) 499.0077 (M<sup>-</sup> requires 499.0095).

**N<sup>1</sup>-[(5''-O-phosphorylethoxy)methyl]-5'-O-phosphoroselenoate-2',3'-O-isopropylidene-inosine-5',5''-cyclicpyrophosphate 5c-1 and 5c-2.** 2-Cyanoethoxy-*N,N,N',N'*-tetra-isopropylphosphoramidite (41  $\mu$ L, 0.13 mmol) was added to a solution of **2** (50 mg, 89  $\mu$ mol) and 1*H*-tetrazole (19 mg, 0.27 mmol) in CH<sub>3</sub>CN (30 mL) under argon. After the reaction was continued for 0.5 h, the CHCl<sub>3</sub> solution (30 mL) of Se (79 mg, 1 mmol) was added and the reaction was continued for 8 h. After the reaction mixture was evaporated, the residue resolved in H<sub>2</sub>O and extracted with CHCl<sub>3</sub> and the aqueous layer was concentrated. The purification was performed with method A for preparative HPLC to give compound **4c** (a pair of diastereoisomers, unseparated, 23.0 mg, 35%). Compound **4c** was resolved in 1M TEAB bicarbonate buffer (pH = 7.5, 5 mL) and the reaction was stirred for 3h at room temperature. After evaporation, the separation of the mixture was performed with method A for preparative HPLC. The fractions of **5c-1** (7.9 mg, 32%) and **5c-2** (13.4 mg, 54%) were collected separately. Data for **5c-1**:  $\delta_H$ (400MHz; D<sub>2</sub>O) 1.48, 1.63 (each s, each 3H, (CH<sub>3</sub>)<sub>2</sub>C), 3.88-3.95 (m, 6H, H<sub>5</sub>', OCH<sub>2</sub>CH<sub>2</sub>OP), 4.65-4.66 (m, 1H, H<sub>4</sub>'), 5.37 (d, 1H,  $J_{H1''a, H1''b} = 11.2$  Hz, H<sub>1</sub>''a), 5.39-5.40 (m, 1H, H<sub>3</sub>'), 5.94-5.96 (m, 2H, H<sub>1</sub>''b, H<sub>2</sub>'), 6.35 (s, 1H, H<sub>1</sub>'), 8.22 (s, 1H, H<sub>8</sub>), 8.49 (s, 1H, H<sub>2</sub>);  $\delta_P$ (121.5 MHz; D<sub>2</sub>O; decoupled with <sup>1</sup>H) -11.39 (s), 34.41 (s); m/z (ESI-TOF<sup>-</sup>) 586.9864 (M<sup>-</sup> requires 586.9847). Data for **5c-2**:  $\delta_H$ (400MHz; D<sub>2</sub>O) 1.47, 1.63 (each s, each 3H, (CH<sub>3</sub>)<sub>2</sub>C), 3.74-3.75 (m, 1H, H<sub>5a</sub>'), 3.89-4.10 (m, 5H, H<sub>5b</sub>', OCH<sub>2</sub>CH<sub>2</sub>OP), 4.72 (m, 1H, H<sub>4</sub>'), 5.31-5.32 (m, 1H, H<sub>3</sub>'), 5.38 (d, 1H,  $J_{H1''a, H1''b} = 10.8$  Hz, H<sub>1</sub>''a), 5.89-5.93 (m, 2H, H<sub>1</sub>''b, H<sub>2</sub>'), 6.30 (s, 1H, H<sub>1</sub>'), 8.24 (s, 1H, H<sub>8</sub>), 8.49 (s, 1H, H<sub>2</sub>);  $\delta_P$ (121.5 MHz; D<sub>2</sub>O; decoupled with <sup>1</sup>H) -11.14 (s), 33.98 (s); m/z (ESI-TOF<sup>-</sup>) 586.9861 (M<sup>-</sup> requires 586.9847).

**N<sup>1</sup>-[(5''-O-phosphorylethoxy)methyl]-5'-O-phosphoroselenoate-inosine-5',5''-cyclic-pyrophosphate P<sup>1</sup><sub>Sc</sub>-cIDPRE-1 and P<sup>1</sup><sub>Sc</sub>-cIDPRE-2.** The solution of **5c-1** (7.9 mg, 10  $\mu$ mol) in 60% HCOOH (5 mL) was stirred for 12 h and then evaporated under reduced pressure. The

purification of the residue was performed with method A for preparative HPLC, and the main fraction was collected to give the target molecule **P<sup>1</sup><sub>sc</sub>-cIDPRE-1** (6.5 mg, 87%). The same treatment was imposed on **5c-2** (13.4 mg, 17 μmol) to give **P<sup>1</sup><sub>sc</sub>-cIDPRE-2** (10.8 mg, 85%), which was purified with the same procedure. Data for **P<sup>1</sup><sub>sc</sub>-cIDPRE-1**: δ<sub>H</sub>(400MHz; D<sub>2</sub>O) 3.86-3.93 (m, 4H, OCH<sub>2</sub>CH<sub>2</sub>OP), 4.10-4.12 (m, 1H, H<sub>5a</sub>'), 4.18-4.19 (m, 1H, H<sub>5b</sub>'), 4.31 (m, 1H, H<sub>4</sub>'), 4.92-4.95 (m, 1H, H<sub>3</sub>'), 5.36-5.38 (m, 1H, H<sub>2</sub>'), 5.47 (d, 1H, J<sub>H<sub>1</sub>'<sub>a</sub>,H<sub>1</sub>'<sub>b</sub></sub> = 11.2 Hz, H<sub>1</sub>'<sub>a</sub>), 5.82 (d, 1H, J<sub>H<sub>1</sub>'<sub>b</sub>,H<sub>1</sub>'<sub>a</sub></sub> = 11.2 Hz, H<sub>1</sub>'<sub>b</sub>), 6.06 (d, 1H, J<sub>H<sub>1</sub>',H<sub>2</sub>'</sub> = 2.8 Hz, H<sub>1</sub>'), 8.19 (s, 1H, H<sub>8</sub>), 8.49 (s, 1H, H<sub>2</sub>); δ<sub>P</sub>(121.5 MHz; D<sub>2</sub>O; decoupled with <sup>1</sup>H) -11.15 (s), 32.97 (s); m/z (ESI-TOF<sup>-</sup>) 546.9509 (M<sup>-</sup> requires 546.9534). Data for **P<sup>1</sup><sub>sc</sub>-cIDPRE-2**: δ<sub>H</sub>(400MHz; D<sub>2</sub>O) 3.81-3.85 (m, 2H, OCH<sub>2</sub>), 3.97-4.01 (m, 2H, CH<sub>2</sub>OP), 4.11-4.15 (m, 1H, H<sub>5a</sub>'), 4.24-4.29 (m, 1H, H<sub>5b</sub>'), 4.33 (m, 1H, H<sub>4</sub>'), 4.83 (m, 1H, H<sub>3</sub>'), 5.37-5.39 (m, 1H, H<sub>2</sub>'), 5.50 (d, 1H, J<sub>H<sub>1</sub>'<sub>a</sub>,H<sub>1</sub>'<sub>b</sub></sub> = 10.8 Hz, H<sub>1</sub>'<sub>a</sub>), 5.79 (d, 1H, J<sub>H<sub>1</sub>'<sub>b</sub>,H<sub>1</sub>'<sub>a</sub></sub> = 10.8 Hz, H<sub>1</sub>'<sub>b</sub>), 6.06 (d, 1H, J<sub>H<sub>1</sub>',H<sub>2</sub>'</sub> = 3.6 Hz, H<sub>1</sub>'), 8.19 (s, 1H, H<sub>8</sub>), 8.52 (s, 1H, H<sub>2</sub>); δ<sub>P</sub>(121.5 MHz; D<sub>2</sub>O; decoupled with <sup>1</sup>H) -11.10 (s), 34.16 (s); m/z (ESI-TOF<sup>-</sup>) 546.9502 (M<sup>-</sup> requires 546.9534).

**N<sup>1</sup>-[(5''-O-(phosphorothioate)ethoxy)methyl]-5'-O-phosphoryl-2',3'-O-isopropylideneinosine-5',5''-cyclicpyrophosphate 9b-1 and 9b-2.** 2-Cyanoethoxy-*N,N,N',N'*-tetraisopropyl phosphoramidite (0.1 mL, 0.33 mmol) was added to a solution of **6** (0.12 g, 0.22 mmol) and 1*H*-tetrazole (46 mg, 0.66 mmol) in CH<sub>3</sub>CN (80 mL) under argon. After the reaction was continued for 0.5 h, CS<sub>2</sub> solution (30 mL) of S<sub>8</sub> (69 mg, 2.16 mmol) was added and the reaction was continued for 8 h. After the reaction mixture was evaporated, the residue resolved in H<sub>2</sub>O and extracted with CHCl<sub>3</sub>. The aqueous layer was concentrated. The purification was performed with method A for preparative HPLC to give compound **8b** (a pair of diastereoisomers, unseparated, 84 mg, 57%). Compound **8b** was resolved in 1M TEAB bicarbonate buffer (pH = 7.5, 10 mL) and the reaction was stirred for 6h at 35°C. After evaporation, the separation of the mixture was performed with method B for preparative HPLC. The fractions of **9b-1** (37 mg, 41%) and **9b-2** (48 mg, 54%) were collected separately. Data for **9b-1**: δ<sub>H</sub>(400 MHz; D<sub>2</sub>O) 1.48, 1.65 (each s, each 3H, (CH<sub>3</sub>)<sub>2</sub>C), 3.87-4.08 (m, 6H, H<sub>5</sub>', OCH<sub>2</sub>CH<sub>2</sub>OP), 4.65-4.66 (m, 1H, H<sub>4</sub>'), 5.36-5.40 (m, 2H, H<sub>3</sub>', H<sub>1</sub>'<sub>a</sub>), 5.87-5.88 (m, 1H, H<sub>2</sub>'), 5.94 (d, 1H, J<sub>H<sub>1</sub>'<sub>b</sub>,H<sub>1</sub>'<sub>a</sub></sub> = 10.8 Hz, H<sub>1</sub>'<sub>b</sub>), 6.36 (s, 1H, H<sub>1</sub>'), 8.22 (s, 1H, H<sub>8</sub>), 8.52 (s, 1H, H<sub>2</sub>); δ<sub>P</sub>(121.5 MHz; D<sub>2</sub>O; decoupled with <sup>1</sup>H) -11.45 (d, J<sub>p,p</sub> = 17.0 Hz), 45.00 (d, J<sub>p,p</sub> = 17.0 Hz); m/z (ESI-TOF<sup>-</sup>) 539.0394 (M<sup>-</sup> requires 539.0408). Data for **9b-2**: δ<sub>H</sub>(400 MHz; D<sub>2</sub>O)

1.48, 1.65 (each s, each 3H, (CH<sub>3</sub>)<sub>2</sub>C), 3.79-4.03 (m, 6H, H<sub>5</sub>, OCH<sub>2</sub>CH<sub>2</sub>OP), 4.72 (m, 1H, H<sub>4</sub>'), 5.35-5.37 (m, 1H, H<sub>3</sub>'), 5.39 (d, 1H, J<sub>H1''a, H1''b</sub> = 10.8 Hz, H<sub>1</sub>''a), 5.92 (d, 1H, J<sub>H1''b, H1''a</sub> = 10.8 Hz, H<sub>1</sub>''b), 6.01-6.03 (m, 1H, H<sub>2</sub>'), 6.31 (s, 1H, H<sub>1</sub>'), 8.24 (s, 1H, H<sub>8</sub>), 8.53 (s, 1H, H<sub>2</sub>); δ<sub>p</sub>(121.5 MHz; D<sub>2</sub>O; decoupled with <sup>1</sup>H) -11.34 (d, J<sub>p,p</sub> = 17.0 Hz), 44.84 (d, J<sub>p,p</sub> = 17.0 Hz); m/z (ESI-TOF<sup>-</sup>) 539.0398 (M<sup>-</sup> requires 539.0408).

**N<sup>1</sup>-[(5''-O-(phosphorothioate)ethoxy)methyl]-5'-O-phosphoryl-inosine-5',5''-cyclic-pyrophosphate P<sub>S</sub><sup>2</sup>-cIDPRE-1 and P<sub>S</sub><sup>2</sup>-cIDPRE-2** The solution of **9b-1** (25 mg, 34 μmol) in 60% HCOOH (10 mL) was stirred for 20 h and then evaporated under reduced pressure. The purification of the residue was performed with method B for preparative HPLC, and the main fraction was collected to give the target molecule **P<sub>S</sub><sup>2</sup>-cIDPRE-1** (20 mg, 85%); The same treatment was imposed on **9b-2** (25 mg, 34 μmol) to give **P<sub>S</sub><sup>2</sup>-cIDPRE-2** (22 mg, 95%), which was purified with the same procedure. Data for **P<sub>S</sub><sup>2</sup>-cIDPRE-1**: δ<sub>H</sub>(400 MHz; D<sub>2</sub>O) 3.85-3.92 (m, 2H, OCH<sub>2</sub>), 3.96-4.03 (m, 2H, CH<sub>2</sub>OP), 4.09-4.13 (m, 1H, H<sub>5a</sub>'), 4.29-4.35 (m, 2H, H<sub>4</sub>', H<sub>5b</sub>'), 4.77-4.78 (m, 1H, H<sub>3</sub>'), 5.44 (d, 1H, J<sub>H1''a, H1''b</sub> = 11.2 Hz, H<sub>1</sub>''a), 5.49-5.51 (m, 1H, H<sub>2</sub>'), 5.88 (d, 1H, J<sub>H1''b, H1''a</sub> = 11.2 Hz, H<sub>1</sub>''b), 6.06 (d, 1H, J<sub>H1', H2'</sub> = 4.4 Hz, H<sub>1</sub>'), 8.21 (s, 1H, H<sub>8</sub>), 8.55 (s, 1H, H<sub>2</sub>); δ<sub>p</sub>(121.5 MHz; D<sub>2</sub>O; decoupled with <sup>1</sup>H) -11.12 (d, J<sub>p,p</sub> = 19.6 Hz), 44.73 (d, J<sub>p,p</sub> = 19.6 Hz); m/z (ESI-TOF<sup>-</sup>) 499.0089 (M<sup>-</sup> requires 499.0095). Data for **P<sub>S</sub><sup>2</sup>-cIDPRE-2**: δ<sub>H</sub>(400 MHz; D<sub>2</sub>O) 3.81-3.88 (m, 2H, OCH<sub>2</sub>), 3.98-4.09 (m, 3H, H<sub>5a</sub>', CH<sub>2</sub>OP), 4.22-4.27 (m, 1H, H<sub>5b</sub>'), 4.33-4.36 (m, 1H, H<sub>4</sub>'), 4.76-4.77 (m, 1H, H<sub>3</sub>'), 5.43-5.45 (m, 1H, H<sub>2</sub>'), 5.51 (d, 1H, J<sub>H1''a, H1''b</sub> = 11.2 Hz, H<sub>1</sub>''a), 5.80 (d, 1H, J<sub>H1''b, H1''a</sub> = 11.2 Hz, H<sub>1</sub>''b), 6.06 (d, 1H, J<sub>H1', H2'</sub> = 4 Hz, H<sub>1</sub>'), 8.20 (s, 1H, H<sub>8</sub>), 8.58 (s, 1H, H<sub>2</sub>); δ<sub>p</sub>(121.5 MHz; D<sub>2</sub>O; decoupled with <sup>1</sup>H) -11.23 (d, J<sub>p,p</sub> = 17.0 Hz), 44.62 (d, J<sub>p,p</sub> = 17.0 Hz); m/z (ESI-TOF<sup>-</sup>) 499.0090 (M<sup>-</sup> requires 499.0095).

**N<sup>1</sup>-[(5''-O-(phosphoroselenoate)ethoxy)methyl]-5'-O-phosphoryl-2',3'-O-isopropylidene-inosine-5',5''-cyclicpyrophosphate 9c-1 and 9c-2.** 2-Cyanoethoxy-*N,N,N',N'*-tetraisopropylphosphoramidite (0.1 mL, 0.33 mmol) was added to a solution of **6** (0.12 g, 0.22 mmol) and 1*H*-tetrazole (46 mg, 0.66 mmol) in CH<sub>3</sub>CN (80 mL) under argon. After the reaction was continued for 0.5 h, the CHCl<sub>3</sub> solution (30 mL) of Se (0.17 g, 2.16 mmol) was added and the reaction was continued for 8 h. After the reaction mixture was evaporated, the residue resolved in H<sub>2</sub>O and extracted with CHCl<sub>3</sub> and the aqueous layer was concentrated. The purification was performed with method A for preparative HPLC to give compound **8c** (a pair of diastereoisomers, unseparated, 47 mg, 30%). Compound **8c** was resolved in 1M TEAB

bicarbonate buffer (pH = 7.5, 10 mL) and the reaction was stirred for 6h at 35°C. After evaporation, the separation of the mixture was performed with method B for preparative HPLC. The fractions of **9c-1** (18 mg, 36%) and **9c-2** (30 mg, 59%) were collected separately. Data for **9c-1**:  $\delta_{\text{H}}$ (400 MHz; D<sub>2</sub>O) 1.50, 1.67 (each s, each 3H, (CH<sub>3</sub>)<sub>2</sub>C), 3.91-3.95 (m, 2H, OCH<sub>2</sub>), 3.99-4.12 (m, 4H, H<sub>5</sub>' , CH<sub>2</sub>OP), 4.66-4.69 (m, 1H, H<sub>4</sub>' ), 5.38-5.41 (m, 2H, H<sub>3</sub>' , H<sub>1</sub>'a), 5.87-5.89 (m, 1H, H<sub>2</sub>' ), 5.95 (d, 1H,  $J_{\text{H}_1''\text{b}, \text{H}_1''\text{a}} = 10.8$  Hz, H<sub>1</sub>'b), 6.37 (s, 1H, H<sub>1</sub>' ), 8.24 (s, 1H, H<sub>8</sub>), 8.53 (s, 1H, H<sub>2</sub>);  $\delta_{\text{P}}$ (121.5 MHz; D<sub>2</sub>O; decoupled with <sup>1</sup>H) -11.81 (d,  $J_{\text{p,p}} = 19.6$  Hz), 34.94 (d,  $J_{\text{p,p}} = 19.6$  Hz); m/z (ESI-TOF<sup>-</sup>) 586.9851 (M<sup>-</sup> requires 586.9847). Data for **9c-2**:  $\delta_{\text{H}}$ (400 MHz; D<sub>2</sub>O) 1.49, 1.67 (each s, each 3H, (CH<sub>3</sub>)<sub>2</sub>C), 3.81-4.07 (m, 6H, H<sub>5</sub>' , OCH<sub>2</sub>CH<sub>2</sub>OP), 4.75-4.76 (m, 1H, H<sub>4</sub>' ), 5.38-5.41 (m, 2H, H<sub>3</sub>, H<sub>1</sub>'a), 5.94 (d, 1H,  $J_{\text{H}_1''\text{b}, \text{H}_1''\text{a}} = 11.2$  Hz, H<sub>1</sub>'b), 6.05-6.07 (m, 1H, H<sub>2</sub>' ), 6.32 (s, 1H, H<sub>1</sub>' ), 8.25 (s, 1H, H<sub>8</sub>), 8.55 (s, 1H, H<sub>2</sub>);  $\delta_{\text{P}}$ (121.5 MHz; D<sub>2</sub>O; decoupled with <sup>1</sup>H) -11.63 (d,  $J_{\text{p,p}} = 17.1$  Hz), 34.65 (d,  $J_{\text{p,p}} = 17.1$  Hz); m/z (ESI-TOF<sup>-</sup>) 586.9846 (M<sup>-</sup> requires 586.9847).

**N<sup>1</sup>-[(5''-O-(phosphoroselenoate)ethoxy)methyl]-5'-O-phosphoryl-inosine-5',5''-cyclic-pyrophosphate P<sub>Se</sub><sup>2</sup>-cIDPRE-1 and P<sub>Se</sub><sup>2</sup>-cIDPRE-2.** The solution of **9c-1** (18 mg, 23 μmol) in 60% HCOOH (10 mL) was stirred for 20 h and then evaporated under reduced pressure. The purification of the residue was performed with method B for preparative HPLC, and the main fraction was collected to give the target molecule **P<sub>Se</sub><sup>2</sup>-cIDPRE-1** (15 mg, 90%). The same treatment was imposed on **9c-2** (25.0 mg, 32 μmol) to give **P<sub>Se</sub><sup>2</sup>-cIDPRE-2** (22 mg, 95%), which was purified with the same procedure. Data for **P<sub>Se</sub><sup>2</sup>-cIDPRE-1**:  $\delta_{\text{H}}$ (400 MHz; D<sub>2</sub>O) 3.86-4.04 (m, 4H, OCH<sub>2</sub>CH<sub>2</sub>OP), 4.11-4.14 (m, 1H, H<sub>5a</sub>' ), 4.28-4.35 (m, 2H, H<sub>5b</sub>' , H<sub>4</sub>' ), 4.76-4.78 (m, 1H, H<sub>3</sub>' ), 5.43 (d, 1H,  $J_{\text{H}_1''\text{a}, \text{H}_1''\text{b}} = 11.2$  Hz, H<sub>1</sub>'a), 5.47-5.50 (m, 1H, H<sub>2</sub>' ), 5.87 (d, 1H,  $J_{\text{H}_1''\text{b}, \text{H}_1''\text{a}} = 11.2$  Hz, H<sub>1</sub>'b), 6.06 (d, 1H,  $J_{\text{H}_1', \text{H}_2'} = 6$  Hz, H<sub>1</sub>' ), 8.20 (s, 1H, H<sub>8</sub>), 8.54 (s, 1H, H<sub>2</sub>);  $\delta_{\text{P}}$ (121.5 MHz; D<sub>2</sub>O; decoupled with <sup>1</sup>H) -11.45 (d,  $J_{\text{p,p}} = 19.6$  Hz), 34.72 (d,  $J_{\text{p,p}} = 19.6$  Hz); m/z (ESI-TOF<sup>-</sup>) 546.9540 (M<sup>-</sup> requires 546.9534). Data for **P<sub>Se</sub><sup>2</sup>-cIDPRE-2**:  $\delta_{\text{H}}$ (400 MHz; D<sub>2</sub>O) 3.83-3.89 (m, 2H, OCH<sub>2</sub>), 4.02-4.09 (m, 3H, H<sub>5a</sub>' , CH<sub>2</sub>OP), 4.24-4.29 (m, 1H, H<sub>5b</sub>' ), 4.34-4.37 (m, 1H, H<sub>4</sub>' ), 4.75-4.77 (m, 1H, H<sub>3</sub>' ), 5.43-5.46 (m, 1H, H<sub>2</sub>' ), 5.51 (d, 1H,  $J_{\text{H}_1''\text{a}, \text{H}_1''\text{b}} = 11.2$  Hz, H<sub>1</sub>'a), 5.81 (d, 1H,  $J_{\text{H}_1''\text{b}, \text{H}_1''\text{a}} = 11.2$  Hz, H<sub>1</sub>'b), 6.06 (d, 1H,  $J_{\text{H}_1', \text{H}_2'} = 4$  Hz, H<sub>1</sub>' ), 8.21 (s, 1H, H<sub>8</sub>), 8.60 (s, 1H, H<sub>2</sub>);  $\delta_{\text{P}}$ (121.5 MHz; D<sub>2</sub>O; decoupled with <sup>1</sup>H) -11.60 (d,  $J_{\text{p,p}} = 19.6$  Hz), 34.56 (d,  $J_{\text{p,p}} = 19.6$  Hz); m/z (ESI-TOF<sup>-</sup>) 546.9536 (M<sup>-</sup> requires 546.9534).
